# **Novel *Wolbachia* strains in *Anopheles* malaria vectors from Sub-Saharan Africa**

Claire L Jeffries<sup>1</sup>, Georgiy Golovko<sup>2</sup>, Mojca Kristan<sup>1</sup>, James Orsborne<sup>1</sup>, Kirstin Spence<sup>1</sup>, Eliot Hurn<sup>1</sup>, Janvier Bandibabone<sup>3</sup>, Luciano M Tantely<sup>4</sup>, Fara N Raharimalala<sup>4</sup>, Kalil Keita<sup>5</sup>, Denka Camara<sup>5</sup>, Yaya Barry<sup>5</sup>, Francis Wat'senga<sup>6</sup>, Emile Z Manzambi<sup>6</sup>, Yaw A Afrane<sup>7</sup>, Abdul R Mohammed<sup>7</sup>, Tarekegn A. Abeku<sup>8</sup>, Shivanand Hegde<sup>9</sup>, Kamil Khanipov<sup>2</sup>, Maria Pimenova<sup>2</sup>, Yuriy Fofanov<sup>2</sup>, Sébastien Boyer<sup>4^</sup>, Grant L Hughes<sup>10</sup> & Thomas Walker<sup>1\*</sup>

\*corresponding author

## **Author affiliations**

1 Department of Disease Control, Faculty of Infectious and Tropical Diseases, London School of Hygiene and Tropical Medicine, London, WC1E 7HT, UK.

2 Department of Pharmacology and Toxicology. University of Texas Medical Branch, Galveston, TX, USA.

3 Laboratoire d'entomologie médicale et parasitologie, Centre de Recherche en Sciences Naturelles (CRSN/LWIRO), Sud-Kivu, Democratic Republic of Congo.

4 Institut Pasteur de Madagascar, Unité d'Entomologie Médicale, Ambatofotsikely, 101-Antananarivo, Madagascar.

5 Nationale de Lutte contre le Paludisme, Ministère de la Santé, B.P. 595, Conakry, Guinea.

6 National Institute of Biomedical Research, PO Box 1192, Kinshasa, Democratic Republic of Congo.

7 Department of Medical Microbiology, College of Health Sciences, University of Ghana, Korle Bu, Accra, Ghana

8 Malaria Consortium, Development House, 56-64 Leonard Street, London, EC2A 4LT, UK.

9 Department of Pathology, University of Texas Medical Branch, Galveston, TX, USA.

10 Department of Pathology, Institute for Human Infections and Immunity, Center for Tropical Diseases, Center for Biodefense and Emerging Infectious Disease. University of Texas Medical Branch, Galveston, TX, USA.

^ current address: Medical Entomology Platform, Institut Pasteur of Cambodia, 5 Bd Monivong PO Box 983, Phnom Penh, Cambodia.

## Abstract

*Anopheles* (*An.*) mosquitoes contain bacteria that can influence *Plasmodium* parasites. *Wolbachia*, a common insect endosymbiont, has historically been considered absent from *Anopheles* but has recently been found in *An. gambiae* populations. Here, we assessed a range of *Anopheles* species from five malaria-endemic countries for *Wolbachia* and *Plasmodium* infection. Strikingly, we found *Wolbachia* infections in *An. coluzzii*, *An. gambiae* s.s., *An. moucheti* and *An.* species 'A', markedly increasing the number of *Anopheles* species known to be naturally infected by this endosymbiont. Molecular analysis suggests the presence of phylogenetically diverse novel strains, while qPCR and 16S rRNA sequencing indicates that *Wolbachia* is the dominant member of the microbiota in *An. moucheti* and *An.* species 'A'. We found no evidence of *Wolbachia/Asaia* co-infections, and neither of these two endosymbionts had any significant effect on malaria prevalence. We discuss the importance of novel *Wolbachia* strains in *Anopheles* species and potential implications for disease control.

## Introduction

Malaria is transmitted to humans through inoculation of *Plasmodium* (*P.*) sporozoites during the infectious bite of a female *Anopheles* (*An.*) mosquito infected with the parasite. The genus *Anopheles* consists of 475 formally recognised species with ~40 vector species/species complexes responsible for the transmission of malaria of public health concern [1]. During the mosquito infection stage, *Plasmodium* parasites encounter a variety of resident microbiota both in the mosquito midgut and other tissues. Numerous studies have shown that certain species of bacteria can inhibit *Plasmodium* development [2–4]. For example, *Enterobacter* bacteria that reside in the *Anopheles* midgut can inhibit the development of *Plasmodium* parasites prior to their invasion of the midgut epithelium [5,6]. *Wolbachia* endosymbiotic bacteria are estimated to naturally infect ~40% of insect species [7] including mosquito vector species that are responsible for transmission of human diseases such as *Culex* (*Cx.*) *quinquefasciatus* [8–10] and *Aedes* (*Ae.*) *albopictus* [11,12]. Although *Wolbachia* strains have been shown to have variable effects on arboviral infections in their native mosquito hosts [13–15], transinfected *Wolbachia* strains have been considered for mosquito biocontrol strategies, due to a variety of synergistic phenotypic effects. Transinfected strains in *Ae. aegypti* and *Ae. albopictus* provide strong inhibitory effects on arboviruses, with maternal transmission and cytoplasmic incompatibility enabling introduced strains to spread through populations [16–22]. Open releases of *Wolbachia*-infected *Ae. aegypti* populations have demonstrated the ability of the wMel *Wolbachia* strain to invade wild populations [23] and provide strong inhibitory effects on viruses from field populations, [24] with releases currently occurring in arbovirus endemic countries such as Indonesia, Vietnam, Brazil and Colombia (<https://www.worldmosquitoprogram.org>).

The prevalence of *Wolbachia* in *Anopheles* species has not been extensively studied, with most studies focused in Asia and using classical PCR-based screening, and historically there has been no evidence of resident strains [25–29]. Furthermore, significant efforts to establish artificially-infected lines were, up until recently, also unsuccessful [30]. Somatic, transient infections of *Wolbachia* strains

wMelPop and wAlbB in *An. gambiae* were shown to significantly inhibit *P. falciparum* malaria [31] but the interference phenotype is variable with other *Wolbachia* strain-parasite combinations [32–34]. A stable line was established in *An. stephensi*, a vector of malaria in southern Asia, using the wAlbB strain and this was also shown to confer resistance to *P. falciparum* infection [35]. One potential reason postulated for the absence of *Wolbachia* in some *Anopheles* species was thought to be due to the presence of other endosymbiotic bacteria, particularly from the genus *Asaia* [36]. This acetic acid bacterium is stably associated with several *Anopheles* species and is often the dominant species in the mosquito microbiota [37]. *Asaia* has been shown to impede the vertical transmission of *Wolbachia* in *Anopheles* [36] and was shown to have a negative correlation with *Wolbachia* in mosquito reproductive tissues [38].

Recently, resident *Wolbachia* strains have been discovered in the *An. gambiae* s.l. complex, which consists of multiple morphologically indistinguishable species including several major malaria vector species. *Wolbachia* strains (collectively named wAnga) were found in *An. gambiae* s.l. populations in Burkina Faso [39] and Mali [40], suggesting that *Wolbachia* may be more abundant in the *An. gambiae* complex across Sub-Saharan Africa than previously thought. Globally, there is a large variety of other *Anopheles* vector species (~70) that have the capacity to transmit malaria [41]. Additionally, this number of malaria vector species may be an underestimate given that recent studies using molecular barcoding have also revealed a larger diversity of *Anopheles* species than would be identified using morphological identification [42,43].

In this study, we collected *Anopheles* mosquitoes from five malaria-endemic countries; Ghana, Democratic Republic of the Congo (DRC), Guinea, Uganda and Madagascar, from 2013-2017, and screened wild-caught adult female *Anopheles* for *P. falciparum* malaria parasites, *Wolbachia* and *Asaia* bacteria. In total, we analysed mosquitoes from 17 *Anopheles* species that are known malaria vectors or implicated in transmission, and some unidentified species, discovering four species of *Anopheles* with resident *Wolbachia* strains. Resident *Wolbachia* strains were found in *An. gambiae* s.s. from DRC, *An. coluzzii* from Ghana, *An. moucheti* from DRC and *Anopheles* species 'A' from DRC. Using *Wolbachia* gene sequencing we show that the resident strains in these malaria vectors are diverse, novel strains and qPCR and 16S rRNA amplicon sequencing data suggests that the strains in *An. moucheti* and *An. species 'A'* are higher density infections, compared to the strains found in the *An. gambiae* s.l. complex. We show no evidence for either *Wolbachia-Asaia* co-infections, or for either endosymbiont having any significant effect on the prevalence of malaria in wild mosquito populations.

## Results

**Mosquito species and resident *Wolbachia* strains.** *Anopheles* species composition varied depending on country and mosquito collection sites (**Table 1**). We detected *Wolbachia* in *An. coluzzii* (previously named M molecular form) mosquitoes from Ghana (prevalence of 4% - termed wAnga-Ghana) and *An. gambiae* s.s. (previously named S molecular form) from all six collection sites in DRC (prevalence range of 8-24% - termed wAnga-DRC) (**Figure 1, Table 1**). The molecular phylogeny of the ITS2 gene of *Anopheles gambiae* s.l. complex individuals (including both *Wolbachia*-infected and uninfected individuals) analysed in our study (**Figure 2**) confirmed molecular species identifications made using species-specific PCR assays. Novel resident *Wolbachia* infections were detected in two additional *Anopheles* species from DRC; *An. moucheti* (termed wAnM) and *An. species A* (termed wAnsA). Additionally, we screened adult female mosquitoes of *An. species A* (collected as larvae and adults) from Lwiro, a village near Katana in DRC, and detected *Wolbachia* in 30/33 (91%), indicating this resident wAnsA strain has a high infection prevalence in populations in this region. The molecular phylogeny of the ITS2 gene revealed *Wolbachia*-infected individuals from Lwiro and Katana are the same *An. species A* (**Figure 3**) previously collected in the highlands of Eastern Zambia [43] and Western Kenya [45].

***Wolbachia* strain typing.** Phylogenetic analysis of the 16S rRNA gene demonstrates that the 16S sequences for these strains cluster with other Supergroup B strains such as wPip (99-100% nucleotide identity) (**Figure 4a**). When compared to the resident *Wolbachia* strains in *An. gambiae* s.l. populations from Mali [40] and Burkina Faso [39], wAnga-Ghana is more closely related to the Supergroup B strain of wAnga from Burkina Faso. The *Wolbachia* surface protein (wsp) gene has been evolving at a faster rate and provides more informative strain phylogenies [46]. As expected, however, and similar to *Wolbachia*-infected *An. gambiae* s.l. from Burkina Faso [39] and Mali [40], a fragment of the wsp gene was not amplified from *Wolbachia*-positive samples from *An. gambiae* s.s. and *An. coluzzii*. Similarly, no wsp gene fragment amplification occurred from wAnM-infected *An. moucheti*. However, wsp sequences were obtained from both *Wolbachia*-infected individuals of *An. species A* from Katana. We also analysed the wsp sequences of 22 specimens of *An. species A* from Lwiro (near Katana) and found identical sequences to the two individuals from Katana. Phylogenetic analysis of the wsp sequences obtained for the wAnsA strain, for both individuals from Katana (wAnsA1 wsp 4, wAnsA2 wsp 1) and three representative individuals from Lwiro (wAnsA1 wsp 1, wAnsA1 wsp 2, wAnsA1 wsp 3) indicates wAnsA is most closely related to *Wolbachia* strains of Supergroup B (such as wPip, wAlbB, wMa and wNo) which is consistent with 16S rRNA phylogeny. However, the improved phylogenetic resolution provided by wsp indicates they cluster separately (**Figure 4b**). Typing of the wAnsA wsp nucleotide sequences highlighted that there were no exact matches to wsp alleles currently in the database, with only the peptide sequence generated for hyper-variable region (HVR) 4 finding an exact match to a peptide sequence currently present in the database (**Table 2**).

Multilocus sequence typing (MLST) was undertaken to provide more accurate strain phylogenies. This was done for the novel *Wolbachia* strains *wAnM* and *wAnsA* in addition to the resident *wAnga-Ghana* strain in *An. coluzzii* from Ghana. We were unable to amplify any of the five MLST genes from *wAnga-DRC*-infected *An. gambiae* s.s. (likely due to low infection densities). Standard MLST primers were used to amplify and sequence all five genes for both *wAnM*-infected *An. moucheti* (W+) DRC-1 and *wAnsA*-infected *An. sp. A/1* (W+) DRC-1. New alleles for all five MLST gene loci (sequences differed from those currently present in the database) confirm the diversity of these novel *Wolbachia* strains (**Table 2**). The phylogeny of these three novel strains based on concatenated sequences of all five MLST gene loci confirms they are grouping within Supergroup B (**Figure 5a**). This also demonstrates the novelty as comparison with a wide range of strains (including all isolates highlighted through partial matching during typing of each locus) shows these strains are distinct from currently available sequences (**Figure 5a, Table 2**). We also found evidence of potential strain variants in *wAnsA* through variable MLST gene fragment amplification and resulting allele numbers. A second *wAnsA*-infected sample, *An. sp. A/1* (W+) DRC-5, only amplified *hcpA* and *coxA* gene fragments and although identical sequences were obtained for *wsp* (**Figure 4b**) and *hcpA*, genetic diversity was seen in the *coxA* sequences, with typing revealing a different but still novel allele resulted for the *coxA* sequence. MLST gene fragment amplification was variable for *wAnga-Ghana* - infected *An. coluzzii*, requiring two individuals to generate the five MLST gene sequences. This is likely due to the low density of this strain potentially influencing the ability to successfully amplify all MLST genes. Despite the sequences generated for this strain producing exact matches with alleles in the database for each of the five gene loci, the resultant allelic profile, and therefore strain type, did not produce a match, showing this *wAnga-Ghana* strain is also a novel strain type. The phylogeny of *Wolbachia* strains based on the *coxA* gene (**Figure 5b**) highlights the genetic diversity of both the *wAnsA* strain variants and also *wAnga-Ghana* compared to the *wAnga-Mali* strain [40]; *coxA* gene sequences are not available for *wAnga* strains from Burkina Faso [39].

**Resident strain densities and relative abundance.** The relative densities of *Wolbachia* strains *wAnga-DRC*, *wAnM* and *wAnsA1* were estimated using qPCR targeting the *ftsZ* [47] and 16S rRNA [40] genes. *ftsZ* and 16S rRNA qPCR analysis indicated the amount of *Wolbachia* detected in *wAnsA1*-infected and *wAnM*-infected females was approximately 1000-fold higher (Ct values 20-22) than *wAnga-DRC*-infected *An. gambiae* s.s. and *wAnga-Ghana*-infected *An. coluzzii* (Ct values 30-33). To account for variation in mosquito body size and DNA extraction efficiency, we compared the total amount of DNA of *Wolbachia*-infected mosquito extracts and found less total DNA in the *wAnsA1*-infected extract (1.36 ng/μL) and the *An. moucheti* (*wAnM*-infected) extract (5.85 ng/μL) compared to the mean of 6.64 +/- 2.33 ng/μL for *wAnga-Ghana*-infected *An. coluzzii*. To estimate the relative abundance of resident *Wolbachia* strains in comparison to other bacterial species, we sequenced the bacterial microbiome using 16S rRNA amplicon sequencing on *Wolbachia*-infected individuals. We found *wAnsA1*, *wAnsA2* and *wAnM* *Wolbachia* strains were the dominant operational taxonomic units (OTUs) of these mosquito species (**Figure 6**). In contrast, the lower density infection *wAnga-Ghana* strain represented only ~10% of the OTUs within the microbiome.

***P. falciparum*, *Wolbachia* and *Asaia* prevalence.** The prevalence of *P. falciparum* in female mosquitoes was extremely variable across countries and collection locations (**Figure 1, Table 1**) with very high prevalence recorded in *An. gambiae* s.s. from villages close to Boke (52%) and Faranah (44%) in Guinea. Despite the collection of other *Anopheles* species in Guinea, *An. gambiae* s.s. was the only species to have detectable malaria infections. In contrast, malaria was detected in multiple major vector species from DRC, including *An. gambiae* s.s., *An. arabiensis* and *An. funestus* s.s. A high prevalence of *P. falciparum* was also detected in *An. gambiae* s.s. from Uganda for both collection years; 19% for 2013 and 36% for 2014, which was consistent with increased malaria transmission (more human cases) occurring in this region in 2014. In contrast, no *P. falciparum* infections were detected in any of the *An. coluzzii*, *An. arabiensis* or *An. melas* collected in Ghana. In Madagascar, *P. falciparum* was detected in only two species; *An. gambiae* s.s. and *An. rufipes*.

We compared the overall *P. falciparum* infection rates in *An. gambiae* s.s. mosquitoes collected across all locations from DRC to determine if there was any correlation with the presence of the low density wAnga-DRC *Wolbachia* resident strain. Overall, of the 128 mosquitoes collected, only 1.56% (n=2) had detectable *Wolbachia-Plasmodium* co-infections compared to 10.16% (n=13) where we only detected *Wolbachia*. A further 11.72% (n=15) were only PCR-positive for *P. falciparum*. As expected, for the vast majority of mosquitoes (76.56%, n=98) we found no evidence of *Wolbachia* or *P. falciparum* present, resulting in no correlation across all samples (Fisher's exact *post hoc* test on unnormalized data, two-tailed,  $P=0.999$ ). Interestingly, one *An.* species 'A' female from Katana was infected with *P. falciparum*.

For all *Wolbachia*-infected females collected in our study (including *An. coluzzii* from Ghana and novel resident strains in *An. moucheti* and *An. species A*), we did not detect the presence of *Asaia*. No resident *Wolbachia* strain infections were detected in *Anopheles* mosquitoes from Guinea, Uganda or Madagascar. However, high *Asaia* and malaria prevalence rates were present in *Anopheles* mosquitoes from Uganda and Guinea (including multiple species in all four sites in Guinea). We compared the overall *P. falciparum* infection rates in *An. gambiae* s.s. collected across all locations from Guinea, with and without *Asaia* bacteria, and found no overall correlation (Fisher's exact *post hoc* test on unnormalized data, two-tailed,  $P=0.4902$ ). There was also no overall correlation between *Asaia* and *P. falciparum* infections in *An. gambiae* s.s. from Uganda for both 2013 (Fisher's exact *post hoc* test on unnormalized data, two-tailed,  $P=0.601$ ) and 2014 (Fisher's exact *post hoc* test on unnormalized data, two-tailed,  $P=0.282$ ).

*Asaia* can be environmentally acquired at all life stages but can also have the potential to be vertically and horizontally transmitted between individual mosquitoes. Therefore, we performed 16S microbiome analysis on a sub-sample of *Asaia*-infected *An. gambiae* s.s. from Kissidougou (Guinea), a location in which high levels of *Asaia* were detected by qPCR (mean *Asaia* Ct = 17.84 +/- 2.27). *Asaia* in these individuals is the dominant bacterial species present (**Figure 7a**) but in Uganda we detected much lower levels of *Asaia* (qPCR mean Ct = 33.33 +/- 0.19) and this was reflected in *Asaia*



not being a dominant species (**Figure 7b**). Interestingly, 2/5 of these individuals from Kissidougou (Guinea) were *P. falciparum*-infected compared to 3/5 individuals from Uganda. The alpha and beta diversity of *An. gambiae* s.s. from Kissidougou, Guinea and Butemba, Uganda shows much more overall diversity in the microbiome for Uganda individuals (**supplementary figure S1**). To determine if the presence of *Asaia* was having a quantifiable effect on the level of *P. falciparum* detected, we normalized *P. falciparum* Ct values from qPCR (**supplementary figure S2a**) and compared gene ratios for *An. gambiae* s.s. mosquitoes from Guinea, with or without *Asaia*. Statistical analysis using student's t-tests (**supplementary figure S2b**) revealed no significant difference between normalized *P. falciparum* gene ratios ( $p = 0.51$ ,  $df = 59$ ). Larger variation of Ct values was seen for *Asaia* (**supplementary figure S2c**) suggesting the bacterial densities in individual mosquitoes were more variable than *P. falciparum* parasite infection levels.

## Discussion

Malaria transmission in Sub-Saharan Africa is highly dependent on the local *Anopheles* vector species but the primary vector complexes recognised are *An. gambiae* s.l., *An. funestus* s.l. *An. nili* s.l., and *An. moucheti* s.l. [41,48]. *An. gambiae* s.s. and *An. coluzzii* sibling species are considered the most important malaria vectors in Sub-Saharan Africa and recent studies indicate that *An. coluzzii* extends further north, and closer to the coast than *An. gambiae* s.s. within west Africa [49]. In our study, high malaria prevalence rates in *An. gambiae* s.s. across Guinea would be consistent with high malaria parasite prevalence (measured by rapid diagnostic tests) in Guéckédou prefecture, and the overall national malaria prevalence estimated to be 44% in 2013 [50]. However, malaria prevalence has decreased in the past few years with an overall prevalence across Guinea estimated at 15% for 2016. Although our *P. falciparum* infection prevalence rates were also high in DRC, recent studies have shown comparable levels of infection with 35% of *An. gambiae* s.l. mosquitoes infected from Kinshasa [51]. We detected *P. falciparum* in *An. gambiae* s.s, *An. arabiensis*, *An. funestus* s.s. and *An. species A* from DRC. Morphological differences have been widely used for identification of malaria vectors but species complexes (such as *An. gambiae* s.l. and *An. funestus* s.l.) require species-diagnostic PCR assays. Historically, malaria entomology studies in Africa have focused predominantly on species from these complexes, likely due to the fact that mosquitoes from these complexes dominate the collections [43]. In our study, we used ITS2 sequencing to confirm secondary vector species that were *P. falciparum*-infected given the difficulties of morphological identification and recent studies demonstrating the inaccuracy of diagnostic species PCR-based molecular identification [52]. Our study is the first to report the detection of *P. falciparum* in *An. rufipes* from Madagascar; previously this species was considered a vector of *Plasmodium* species of non-human origin and has only very recently been implicated in human malaria transmission [53]. However, detection of *P. falciparum* parasites (all stages) in whole body mosquitoes does not confirm that the species plays a significant role in transmission. Detection could represent infected bloodmeal stages or oocysts present in the midgut wall so further studies are warranted to determine this species ability to transmit human malaria parasites.

The mosquito microbiota can modulate the mosquito immune response and bacteria present in wild *Anopheles* populations can influence malaria vector competence [4,5]. Endosymbiotic *Wolbachia* bacteria are particularly widespread through insect populations but they were commonly thought to be absent from *Anopheles* mosquitoes. However, the recent discovery of *Wolbachia* strains in the *An. gambiae* s.l. complex in Burkina Faso and Mali [39,40] in addition to our study showing infection in *Anopheles* from Ghana and DRC, suggest resident strains could be widespread across Sub-Saharan Africa. The discovery of resident strains in Burkina Faso resulted from sequencing of the 16S rRNA gene identifying *Wolbachia* sequences rather than screening using *Wolbachia*-specific genes [39]. Intriguingly, *Wolbachia* infections in these mosquitoes could not be detected using conventional PCR targeting the *wsp* gene. As the *wsp* gene has often been used in previous studies to detect strains in *Anopheles* species [25,27], this could explain why resident strains in the *An. gambiae* s.l. complex have gone undetected until very recently. Recent similar methods using 16S rRNA amplicon sequencing to determine the overall microbiota in wild mosquito populations has provided evidence for *Wolbachia* infections in *An. gambiae* in additional villages in Burkina Faso [54] and *Anopheles* species collected in Illinois, USA [55]. Our study describing resident *Wolbachia* strains in numerous species of *Anopheles* malaria vectors also highlights the potential for *Wolbachia* to be influencing malaria transmission, as postulated by previous studies [39,40,56]. Although no significant correlation was present for malaria and *Wolbachia* prevalence in *An. gambiae* s.s. from DRC, we only detected co-infections in two individuals compared to 13 and 15 individuals infected only with *Wolbachia* or *P. falciparum* respectively. The infection prevalence of resident *Wolbachia* strains in *An. coluzzii* from Ghana (4%) and *An. gambiae* s.s. from the DRC was variable but low (8-24%), consistent with infection prevalence in Burkina Faso (11%) [39] but much lower than those reported in Mali (60-80%) [40] where infection was associated with reduced prevalence and intensity of sporozoite infection in field-collected females.

The discovery of a resident *Wolbachia* strain in *An. moucheti*, a highly anthropophilic and efficient malaria vector found in the forested areas of western and central Africa [41], suggests further studies are warranted that utilize large sample sizes to examine the influence of the *wAnM* *Wolbachia* strain on *Plasmodium* infection dynamics in this malaria vector. *An. moucheti* is often the most abundant vector, breeding in slow moving streams and rivers, contributing to year round malaria transmission in these regions [57,58]. This species has also been implicated as a main bridge vector species in the transmission of *Plasmodium* malaria in Gabon [59]. There is thought to be high genetic diversity in *An. moucheti* populations [60,61] which may either influence the prevalence of *Wolbachia* resident strains or *Wolbachia* could be contributing to genetic diversity through its effect on host reproduction. A novel *Wolbachia* strain in *An. species 'A'*, present at high infection frequencies in Lwiro (close to Katana in DRC), also suggests more *Anopheles* species, including unidentified and potentially new species, could be infected with this widespread endosymbiotic bacterium. *An. species A* should be further investigated to determine if this species is a potential malaria vector given our study demonstrated *P. falciparum* infection in one of two individuals screened and ELISA-positive samples of this species were reported from the Western Highlands of Kenya [62].



The variability of *Wolbachia* prevalence rates in *An. gambiae* s.l. complex from locations within DRC and Ghana and previous studies in Burkina Faso [39] and Mali [40] suggest the environment is one factor that influences the presence or absence of resident strains. In our study we found no evidence of *Wolbachia*-*Asaia* co-infections across all countries, supporting laboratory studies that have shown these two bacterial endosymbionts demonstrate competitive exclusion in *Anopheles* species [36,38]. We also found that *Asaia* infection densities (whole body mosquitoes) were variable and location dependent which would correlate with this bacterium being environmentally acquired at all life stages, but also having the potential for both vertical and horizontal transmission [37]. Significant variations in overall *Asaia* prevalence and density across different *Anopheles* species and locations in our study would also correlate with our data indicating no evidence of an association with *P. falciparum* prevalence in both Guinea and Uganda populations. Further studies are needed to determine the complex interaction between these two bacterial endosymbionts and malaria in diverse *Anopheles* malaria vector species.

Our qPCR and 16S microbiome analysis indicates the densities of wAnM and wAnsA strains are significantly higher than resident *Wolbachia* strains in *An. gambiae* s.l. However, caution must be taken as we were only able to analyse selected individuals and larger collections of wild populations would be required to confirm these results. Native *Wolbachia* strains dominating the microbiome of *An. species A* and *An. moucheti* is consistent with other studies of resident strains in mosquitoes showing *Wolbachia* 16S rRNA gene amplicons vastly outnumber sequences from other bacteria in *Ae. albopictus* and *Cx. quinquefasciatus* [63,64]. The discovery of novel *Wolbachia* strains provides the rationale to undertake vector competence experiments to determine what effect these strains are having on malaria transmission. The tissue tropism of novel *Wolbachia* strains in malaria vectors will be particularly important to characterise given this will determine if these endosymbiotic bacteria are proximal to malaria parasites within the mosquito. It would also be important to determine the additional phenotypic effects novel resident *Wolbachia* strains have on their mosquito hosts. Some *Wolbachia* strains induce a reproductive phenotype termed cytoplasmic incompatibility (CI) that results in inviable offspring when an uninfected female mates with a *Wolbachia*-infected male. In contrast, *Wolbachia*-infected females produce viable progeny when they mate with both infected and uninfected male mosquitoes. This reproductive advantage over uninfected females allows *Wolbachia* to invade mosquito populations.

*Wolbachia* has been the focus of recent biocontrol strategies in which *Wolbachia* strains transferred into naïve mosquito species provide strong inhibitory effects on arboviruses [19,20,65–68] and malaria parasites [31,35]. The discovery of two novel *Wolbachia* strains in *Anopheles* mosquitoes, potentially present at much higher density than resident strains in the *An. gambiae* s.l. complex, also suggests the potential for these strains to be transinfected into other *Anopheles* species to produce inhibitory effects on *Plasmodium* parasites. *Wolbachia* transinfection success is partly attributed to the relatedness of donor and recipient host so the transfer of high density *Wolbachia* strains between *Anopheles* species may result in stable infections (or co-infections) that have strong inhibitory effects

on *Plasmodium* development. Finally, if the resident strain present in *An. moucheti* is at low infection frequencies in wild populations, an alternative strategy known as the incompatible insect technique (IIT) could be implemented where *Wolbachia*-infected males are released to suppress the wild populations through CI (reviewed by [22]). In summary, the important discovery of diverse novel *Wolbachia* strains in *Anopheles* species will help our understanding of how *Wolbachia* strains can potentially impact malaria transmission through natural associations or being used as candidate strains for transinfection to create stable infections in other species.

## Materials and Methods.

**Study sites & collection methods.** *Anopheles* adult mosquitoes were collected from 5 malaria endemic countries in Sub-Saharan Africa; Guinea, Democratic Republic of Congo (DRC), Ghana and Uganda and Madagascar between 2013 – 2017 (**Figure 1**). Human landing catches, CDC light traps and pyrethrum spray catches were undertaken between April 2014-February 2015 in 10 villages near four cities in Guinea; Foulayah (10.144633, -10.749717) and Balayani (10.1325, -10.7443) from near Faranah; Djoumaya (10.836317, -14.2481) and Kaboye Amaraya (10.93435, -14.36995) near Boke; Tongbekoro (9.294295, -10.147953), Keredou (9.208919, -10.069525), and Gbangbadou (9.274363, -9.998639) near Kissidougou; and Makonon (10.291124, -9.363358), Balandou (10.407669, -9.219096), and Dalabani (10.463692, -9.451904) near Kankan. Human landing catches and pyrethrum spray catches were undertaken between January – September 2015 in seven sites of the DRC; Kinshasa (-4.415881, 15.412188), Mikalayi (-6.024184, 22.318251), Kisangani (0.516350, 25.221176), Katana (-2.225129, 28.831604), Kalemie (-5.919054, 29.186572), and Kopolowe (-10.939802, 26.952970). We also analysed a subset from collections obtained from Lwiro (-2.244097, 28.815232), a village near Katana, collected between in September – October 2015. A combination of CDC light traps, pyrethrum spray catches and human landing catches were undertaken in Butemba, Kyankwanzi District in mid-western Uganda (1.1068444, 31.5910085) in August and September 2013 and June 2014. CDC light trap catches were undertaken in May 2017 in Dogo in Ada, Greater Accra, Ghana (5.874861111, 0.560611111). In Madagascar, sampling was undertaken at five sites: Anivorano Nord, located in the Northern domain, (-12.7645000, 49.2386944), Ambomiharina, Western domain, (-16.3672778, 46.9928889), Antafia, Western domain, (-17.0271667, 46.7671389) and Ambohimarina, Central domain, (-18.3329444, 47.1092500). Trapping consisted of CDC light traps and a net trap baited with Zebu (local species of cattle) to attract zoophilic species [69].

**DNA extraction and species identification.** DNA was extracted from individual whole mosquitoes or abdomens using QIAGEN DNAeasy Blood and Tissue Kits according to manufacturer's instructions. DNA extracts were eluted in a final volume of 100 µL and stored at -20°C. Species identification was initially undertaken using morphological keys followed by diagnostic species-specific PCR assays to distinguish between the morphologically indistinguishable sibling mosquito species of the *Anopheles gambiae* [70–72] and *Anopheles funestus* complexes [73]. To determine species identification for

samples of interest and samples that could not be identified by species-specific PCR, sanger sequences were generated from ITS2 PCR products [74].

**Detection of *P. falciparum* and *Asaia*.** Detection of *P. falciparum* malaria was undertaken using qPCR targeting a 120-bp sequence of the *P. falciparum* cytochrome c oxidase subunit 1 (Cox1) mitochondrial gene [75] as preliminary trials revealed this was the optimal method for both sensitivity and specificity. Positive controls from gDNA extracted from a cultured *P. falciparum*-infected blood sample (parasitaemia of ~10%) were serially diluted to determine the threshold limit of detection, in addition to the inclusion no template controls (NTCs). *Asaia* detection was undertaken targeting the 16S rRNA gene [76,77]. Ct values for both *P. falciparum* and *Asaia* assays in selected *An. gambiae* extracts were normalized to Ct values for a single copy *An. gambiae* rps17 housekeeping gene (accession no. AGAP004887 on [www.vectorbase.org](http://www.vectorbase.org)) [78,79]. As Ct values are inversely related to the amount of amplified DNA, a higher target gene Ct: host gene Ct ratio represented a lower estimated infection level. qPCR reactions were prepared using 5µL of FastStart SYBR Green Master mix (Roche Diagnostics), a final concentration of 1µM of each primer, 1µL of PCR grade water and 2µL template DNA, to a final reaction volume of 10µL. Prepared reactions were run on a Roche LightCycler® 96 System and amplification was followed by a dissociation curve (95°C for 10 seconds, 65°C for 60 seconds and 97°C for 1 second) to ensure the correct target sequence was being amplified. PCR results were analysed using the LightCycler® 96 software (Roche Diagnostics). A sub-selection of PCR products from each assay was sequenced to confirm correct amplification of the target gene fragment.

**Wolbachia detection.** *Wolbachia* detection was first undertaken targeting three conserved *Wolbachia* genes previously shown to amplify a wide diversity of strains; 16S rDNA gene [40,80], *Wolbachia* surface protein (wsp) gene [46] and FtsZ cell cycle gene [81]. DNA extracted from a *Drosophila melanogaster* fly (infected with the wMel strain of *Wolbachia*) was used as a positive control, in addition to no template controls (NTCs). 16S rDNA [80] and wsp [46] gene PCR reactions were carried out in a Bio-Rad T100 Thermal Cycler using standard cycling conditions and PCR products were separated and visualised using 2% Egel EX agarose gels (Invitrogen) with SYBR safe and an Invitrogen E-gel iBase Real-Time Transilluminator. FtsZ [47] and 16S rDNA [40] gene real time PCR reactions were prepared using 5µL of FastStart SYBR Green Master mix (Roche Diagnostics), a final concentration of 1µM of each primer, 1µL of PCR grade water and 2µL template DNA, to a final reaction volume of 10µL. Prepared reactions were run on a Roche LightCycler® 96 System for 15 minutes at 95°C, followed by 40 cycles of 95°C for 15 seconds and 58°C for 30 seconds. Amplification was followed by a dissociation curve (95°C for 10 seconds, 65°C for 60 seconds and 97°C for 1 second) to ensure the correct target sequence was being amplified. PCR results were analysed using the LightCycler® 96 software (Roche Diagnostics). To estimate *Wolbachia* densities across multiple *Anopheles* mosquito species, *ftsZ* and 16S qPCR Ct values were compared to total dsDNA extracted measured using an Invitrogen Qubit 4 fluorometer. A serial dilution series of a known *Wolbachia*-infected mosquito DNA extract was used to correlate Ct values and amount of amplified target product.

**Wolbachia MLST.** Multilocus sequence typing (MLST) was undertaken to characterize *Wolbachia* strains using the sequences of five conserved genes as molecular markers to genotype each strain. In brief, 450-500 base pair fragments of the *coxA*, *fbpA*, *hcpA*, *gatB* and *ftsZ* *Wolbachia* genes were amplified from individual *Wolbachia*-infected mosquitoes using previously optimised protocols [82]. A *Cx. pipiens* gDNA extraction (previously shown to be infected with the *wPip* strain of *Wolbachia*) was used as a positive control for each PCR run, in addition to no template controls (NTCs). If no amplification was detected using standard primers, further PCR analysis was undertaken using degenerate primers [82]. PCR products were separated and visualised using 2% Egel EX agarose gels (Invitrogen) with SYBR safe and an Invitrogen E-gel iBase Real-Time Transilluminator. PCR products were submitted to Source BioScience (Source BioScience Plc, Nottingham, UK) for PCR reaction clean-up, followed by Sanger sequencing to generate both forward and reverse reads. Sequencing analysis was carried out in MEGA7 [83] as follows. Both chromatograms (forward and reverse traces) from each sample was manually checked, analysed, and edited as required, followed by alignment by ClustalW and checking to produce consensus sequences. Consensus sequences were used to perform nucleotide BLAST (NCBI) database queries, and searches against the *Wolbachia* MLST database (<http://pubmlst.org/wolbachia>) [84]. If a sequence produced an exact match in the MLST database, we assigned the appropriate allele number, otherwise new alleles were added and complete MLST profiles submitted to the *Wolbachia* MLST database.

**Phylogenetic analysis.** Maximum Likelihood phylogenetic trees were constructed from Sanger sequences as follows. The evolutionary history was inferred by using the Maximum Likelihood method based on the Tamura-Nei model [87]. The tree with the highest log likelihood in each case is shown. The percentage of trees in which the associated taxa clustered together is shown next to the branches. Initial tree(s) for the heuristic search were obtained automatically by applying Neighbor-Join and BioNJ algorithms to a matrix of pairwise distances estimated using the Maximum Composite Likelihood (MCL) approach, and then selecting the topology with superior log likelihood value. The trees are drawn to scale, with branch lengths measured in the number of substitutions per site. Codon positions included were 1st+2nd+3rd+Noncoding. All positions containing gaps and missing data were eliminated. The phylogeny test was by Bootstrap method with 1000 replications. Evolutionary analyses were conducted in MEGA7 [83].

**Microbiome Analysis.** The microbiomes of selected individual *Anopheles* were analysed using barcoded high-throughput amplicon sequencing of the bacterial 16S rRNA gene. Sequencing libraries for each isolate were generated using universal 16S rRNA V3-V4 region primers [85] in accordance with Illumina 16S rRNA metagenomic sequencing library protocols. The samples were barcoded for multiplexing using Nextera XT Index Kit v2. Sequencing was performed on an Illumina MiSeq instrument using a MiSeq Reagent Kit v2 (500-cycles). Quality control and taxonomical assignment of the resulted reads was performed using CLC Genomics Workbench 8.0.1 Microbial Genomics Module (<http://www.clcbio.com>). Low quality reads containing nucleotides with quality threshold below 0.05 (using the modified Richard Mott algorithm), as well as reads with two or more unknown nucleotides were removed from analysis. Additionally reads were trimmed to remove

sequenced Nextera adapters. Reference based OTU picking was performed using the SILVA SSU v128 97% database [86]. Sequences present in more than one copy but not clustered to the database were then placed into de novo OTUs (97% similarity) and aligned against the reference database with 80% similarity threshold to assign the “closest” taxonomical name where possible. Chimeras were removed from the dataset if the absolute crossover cost was 3 using a k-mer size of 6. Alpha diversity was measured using Shannon entropy (OTU level).

**Statistical analysis.** Fisher’s exact *post hoc* test in Graphpad Prism 7 was used to compare infection rates. Normalised qPCR Ct ratios were compared using unpaired t-tests in GraphPad Prism 7.

**Authors’ contributions.** CLJ, GGL, MK, JO, KS, EH & TW performed sample analysis. CLJ performed sequence analysis. MK, JO, JB, EH, MLT, FNR, KK, DC, YB, FW, EZM, YAA, ARM, TAA performed field collections. SB facilitated field collections. SH, KK, MP, YF, GLH performed 16S microbiome sample analysis. GLH and TW provided overall supervision. CLJ and TW wrote the initial draft.

**Acknowledgements.** We would like to thank all the mosquito collectors and residents of the villages where collections took place. CLJ and TW were supported by a Wellcome Trust /Royal Society grant awarded to TW (101285/Z/13/Z): <http://www.wellcome.ac.uk>; <https://royalsociety.org>. GLH is supported by NIH grants (R21AI124452 and R21AI129507), a University of Texas Rising Star award, the John S. Dunn Foundation Collaborative Research Award, the Robert J. Kleberg, Jr. and Helen C. Kleberg Foundation, and the Centers for Disease Control and Prevention (CDC) (Cooperative Agreement Number U01CK000512). The papers contents are solely the responsibility of the authors and do not necessarily represent the official views of the CDC or the Department of Health and Human Services. This work was also supported by a James W. McLaughlin postdoctoral fellowship at the University of Texas Medical Branch to SH. Field work in Uganda was funded by UK aid (through the Programme Partnership Arrangement grant to Malaria Consortium). YAA and ARM were supported by a NIH grant R01AI123074. The funders had no role in study design, data collection and analysis, decision to publish, or preparation of the manuscript.



## References

1. Hay SI, Sinka ME, Okara RM, Kabaria CW, Mbithi PM, Tago CC, et al. Developing global maps of the dominant anopheles vectors of human malaria. *PLoS Med.* 2010/02/18. 2010;7: e1000209. doi:10.1371/journal.pmed.1000209
2. Cirimotich CM, Dong Y, Clayton AM, Sandiford SL, Souza-Neto JA, Mulenga M, et al. Natural microbe-mediated refractoriness to Plasmodium infection in Anopheles gambiae. *Science* (80-). 2011/05/14. 2011;332: 855–858. doi:10.1126/science.1201618
3. Cirimotich CM, Ramirez JL, Dimopoulos G. Native microbiota shape insect vector competence for human pathogens. *Cell Host and Microbe.* 2011. pp. 307–310. doi:10.1016/j.chom.2011.09.006
4. Dennison NJ, Jupatanakul N, Dimopoulos G. The mosquito microbiota influences vector competence for human pathogens. *Curr Opin Insect Sci.* 2014;3: 6–13. doi:10.1016/j.cois.2014.07.004
5. Boissiere A, Tchioffo MT, Bachar D, Abate L, Marie A, Nsango SE, et al. Midgut microbiota of the malaria mosquito vector Anopheles gambiae and interactions with Plasmodium falciparum infection. *PLoS Pathog.* 2012/06/14. 2012;8: e1002742. doi:10.1371/journal.ppat.1002742
6. Dennison NJ, Saraiva RG, Cirimotich CM, Mlambo G, Mongodin EF, Dimopoulos G. Functional genomic analyses of Enterobacter, Anopheles and Plasmodium reciprocal interactions that impact vector competence. *Malar J.* 2016;15. doi:10.1186/s12936-016-1468-2
7. Zug R, Hammerstein P. Still a host of hosts for Wolbachia: analysis of recent data suggests that 40% of terrestrial arthropod species are infected. *PLoS One.* 2012/06/12. 2012;7: e38544. doi:10.1371/journal.pone.0038544
8. Klasson L, Walker T, Sebaihia M, Sanders MJ, Quail MA, Lord A, et al. Genome evolution of Wolbachia strain wPip from the Culex pipiens group. *Mol Biol Evol.* 2008;25: 1877–1887. doi:10.1093/molbev/msn133
9. Laven H. Speciation by cytoplasmic isolation in the Culex pipiens-complex. *Cold Spring Harb Symp Quant Biol.* 1959/01/01. 1959;24: 166–173. Available: <http://www.ncbi.nlm.nih.gov/pubmed/14414640>
10. Sinkins SP, Walker T, Lynd AR, Steven AR, Makepeace BL, Godfray HCJ, et al. Wolbachia variability and host effects on crossing type in Culex mosquitoes. *Nature.* 2005;436: 257–260.

doi:Doi 10.1038/Nature03629

11. Dutton TJ, Sinkins SP. Strain-specific quantification of Wolbachia density in *Aedes albopictus* and effects of larval rearing conditions. *Insect Mol Biol.* 2004/05/26. 2004;13: 317–322.  
doi:10.1111/j.0962-1075.2004.00490.x
12. Sinkins SP, Braig HR, O'Neill SL. Wolbachia pipientis: bacterial density and unidirectional cytoplasmic incompatibility between infected populations of *Aedes albopictus*. *Exp Parasitol.* 1995/11/01. 1995;81: 284–291. Available: <http://www.ncbi.nlm.nih.gov/pubmed/7498425>
13. Glaser RL, Meola MA. The native Wolbachia endosymbionts of *Drosophila melanogaster* and *Culex quinquefasciatus* increase host resistance to West Nile virus infection. *PLoS One.* 2010/08/12. 2010;5: e11977. doi:10.1371/journal.pone.0011977
14. Mousson L, Zouache K, Arias-Goeta C, Raquin V, Mavingui P, Failloux AB. The native Wolbachia symbionts limit transmission of dengue virus in *Aedes albopictus*. *PLoS Negl Trop Dis.* 2013/01/10. 2012;6: e1989. doi:10.1371/journal.pntd.0001989
15. Silva JBL, Alves DM, Bottino-Rojas V, Pereira TN, Sorgine MHF, Caragata EP, et al. Wolbachia and dengue virus infection in the mosquito *Aedes fluviatilis* (Diptera: Culicidae). *PLoS One.* 2017;12. doi:10.1371/journal.pone.0181678
16. Walker T, Johnson PH, Moreira LA, Iturbe-Ormaetxe I, Frentiu FD, McMeniman CJ, et al. The wMel Wolbachia strain blocks dengue and invades caged *Aedes aegypti* populations. *Nature.* 2011;476: 450-U101. doi:Doi 10.1038/Nature10355
17. Iturbe-Ormaetxe I, Walker T, SL ON. Wolbachia and the biological control of mosquito-borne disease. *EMBO Rep.* 2011/05/07. 2011;12: 508–518. doi:10.1038/embor.2011.84
18. Joubert DA, Walker T, Carrington LB, De Bruyne JT, Kien DHT, Hoang NLT, et al. Establishment of a Wolbachia Superinfection in *Aedes aegypti* Mosquitoes as a Potential Approach for Future Resistance Management. *PLoS Pathog.* 2016;12.  
doi:10.1371/journal.ppat.1005434
19. Moreira LA, Iturbe-Ormaetxe I, Jeffery JA, Lu G, Pyke AT, Hedges LM, et al. A Wolbachia symbiont in *Aedes aegypti* limits infection with dengue, Chikungunya, and Plasmodium. *Cell.* 2010/01/13. 2009;139: 1268–1278. doi:10.1016/j.cell.2009.11.042
20. Bian G, Xu Y, Lu P, Xie Y, Xi Z. The endosymbiotic bacterium Wolbachia induces resistance to dengue virus in *Aedes aegypti*. *PLoS Pathog.* 2010/04/07. 2010;6: e1000833.

doi:10.1371/journal.ppat.1000833

21. Blagrove MS, Arias-Goeta C, Failloux AB, Sinkins SP. Wolbachia strain wMel induces cytoplasmic incompatibility and blocks dengue transmission in *Aedes albopictus*. *Proc Natl Acad Sci U S A*. 2011/11/30. 2012;109: 255–260. doi:10.1073/pnas.1112021108
22. Bourtzis K, Dobson SL, Xi Z, Rasgon JL, Calvitti M, Moreira LA, et al. Harnessing mosquito-Wolbachia symbiosis for vector and disease control. *Acta Trop*. 2013/11/21. 2013; doi:10.1016/j.actatropica.2013.11.004
23. Hoffmann AA, Montgomery BL, Popovici J, Iturbe-Ormaetxe I, Johnson PH, Muzzi F, et al. Successful establishment of Wolbachia in *Aedes* populations to suppress dengue transmission. *Nature*. 2011/08/26. 2011;476: 454–457. doi:10.1038/nature10356
24. Frentiu FD, Zakir T, Walker T, Popovici J, Pyke AT, van den Hurk A, et al. Limited Dengue Virus Replication in Field-Collected *Aedes aegypti* Mosquitoes Infected with Wolbachia. *PLoS Negl Trop Dis*. 2014;8. doi:ARTN e2688DOI 10.1371/journal.pntd.0002688
25. Kittayapong P, Baisley KJ, Baimai V, O'Neill SL. Distribution and diversity of Wolbachia infections in Southeast Asian mosquitoes (Diptera: Culicidae). *J Med Entomol*. 2000;37: 340–345. doi:10.1603/0022-2585(2000)037[0340:DADOWI]2.0.CO;2
26. Tiawsirisup S, Sripatranusorn S, Oraveerakul K, Nuchprayoon S. Distribution of mosquito (Diptera: Culicidae) species and Wolbachia (Rickettsiales: Rickettsiaceae) infections during the bird immigration season in Pathumthani province, central Thailand. *Parasitol Res*. 2007/12/11. 2008;102: 731–735. doi:10.1007/s00436-007-0825-z
27. Wiwatanaratnabutr I. Geographic distribution of wolbachial infections in mosquitoes from Thailand. *J Invertebr Pathol*. 2013;114: 337–340. doi:10.1016/j.jip.2013.04.011
28. Ricci I, Cancrini G, Gabrielli S, D'Amelio S, Favi G. Searching for Wolbachia (Rickettsiales: Rickettsiaceae) in mosquitoes (Diptera: Culicidae): large polymerase chain reaction survey and new identifications. *J Med Entomol*. 2002/07/30. 2002;39: 562–567. Available: <http://www.ncbi.nlm.nih.gov/pubmed/12144285>
29. Rasgon JL, Scott TW. An initial survey for Wolbachia (Rickettsiales: Rickettsiaceae) infections in selected California mosquitoes (Diptera: Culicidae). *J Med Entomol*. 2004/04/06. 2004;41: 255–257. Available: <http://www.ncbi.nlm.nih.gov/pubmed/15061286>
30. Walker T, Moreira LA. Can Wolbachia be used to control malaria? *Mem Inst Oswaldo Cruz*.

- 2011;106: 212–217.
31. Hughes GL, Koga R, Xue P, Fukatsu T, Rasgon JL. Wolbachia infections are virulent and inhibit the human malaria parasite *Plasmodium falciparum* in *Anopheles gambiae*. *PLoS Pathog.* 2011/06/01. 2011;7: e1002043. doi:10.1371/journal.ppat.1002043
32. Hughes GL, Vega-Rodriguez J, Xue P, Rasgon JL. Wolbachia strain wAlbB enhances infection by the rodent malaria parasite *Plasmodium berghei* in *Anopheles gambiae* mosquitoes. *Appl Env Microbiol.* 2012/01/03. 2012;78: 1491–1495. doi:10.1128/AEM.06751-11
33. Murdock CC, Blanford S, Hughes GL, Rasgon JL, Thomas MB. Temperature alters *Plasmodium* blocking by Wolbachia. *Sci Rep.* 2014/02/04. 2014;4: 3932. doi:10.1038/srep03932
34. Hughes GL, Rivero A, Rasgon JL. Wolbachia Can Enhance *Plasmodium* Infection in Mosquitoes: Implications for Malaria Control? *PLoS Pathog.* 2014; doi:10.1371/journal.ppat.1004182
35. Bian G, Joshi D, Dong Y, Lu P, Zhou G, Pan X, et al. Wolbachia invades *Anopheles stephensi* populations and induces refractoriness to *Plasmodium* infection. *Science* (80- ). 2013/05/11. 2013;340: 748–751. doi:10.1126/science.1236192
36. Hughes GL, Dodson BL, Johnson RM, Murdock CC, Tsujimoto H, Suzuki Y, et al. Native microbiome impedes vertical transmission of Wolbachia in *Anopheles* mosquitoes. *Proc Natl Acad Sci.* 2014;111: 12498–12503. doi:10.1073/pnas.1408888111
37. Favia G, Ricci I, Damiani C, Raddadi N, Crotti E, Marzorati M, et al. Bacteria of the genus *Asaia* stably associate with *Anopheles stephensi*, an Asian malarial mosquito vector. *Proc Natl Acad Sci U S A.* 2007/05/16. 2007;104: 9047–9051. doi:10.1073/pnas.0610451104
38. Rossi P, Ricci I, Cappelli A, Damiani C, Ulissi U, Mancini M V, et al. Mutual exclusion of *Asaia* and Wolbachia in the reproductive organs of mosquito vectors. *Parasit Vectors.* 2015;8: 278. doi:10.1186/s13071-015-0888-0
39. Baldini F, Segata N, Pompon J, Marcenac P, Robert Shaw W, Dabiré RK, et al. Evidence of natural Wolbachia infections in field populations of *Anopheles gambiae*. *Nat Commun.* 2014;5. doi:10.1038/ncomms4985
40. Gomes FM, Hixson BL, Tyner MDW, Ramirez JL, Canepa GE, Alves e Silva TL, et al. Effect of

naturally occurring *Wolbachia* in *Anopheles gambiae* s.l. mosquitoes from Mali on *Plasmodium falciparum* malaria transmission. Proc Natl Acad Sci. 2017; 201716181.

doi:10.1073/pnas.1716181114

41. Sinka ME, Bangs MJ, Manguin S, Coetzee M, Mbogo CM, Hemingway J, et al. The dominant *Anopheles* vectors of human malaria in Africa, Europe and the Middle East: occurrence data, distribution maps and bionomic precis. Parasit Vectors. 2010/12/07. 2010;3: 117.  
doi:10.1186/1756-3305-3-117
42. Stevenson J, St Laurent B, Lobo NF, Cooke MK, Kahindi SC, Oriango RM, et al. Novel vectors of malaria parasites in the western highlands of Kenya. Emerg Infect Dis. 2012/08/31. 2012;18: 1547–1549. doi:10.3201/eid1809.120283
43. Lobo NF, St. Laurent B, Sikaala CH, Hamainza B, Chanda J, Chinula D, et al. Unexpected diversity of *Anopheles* species in Eastern Zambia: Implications for evaluating vector behavior and interventions using molecular tools. Sci Rep. 2015;5. doi:10.1038/srep17952
44. Hughes GL, Rasgon JL. Transinfection: a method to investigate *Wolbachia*-host interactions and control arthropod-borne disease. Insect Mol Biol. 2013/12/18. 2013;  
doi:10.1111/imb.12066
45. Laurent BS, Cooke M, Krishnankutty SM, Asih P, Mueller JD, Kahindi S, et al. Molecular characterization reveals diverse and unknown malaria vectors in the western Kenyan highlands. Am J Trop Med Hyg. 2016;94: 327–335. doi:10.4269/ajtmh.15-0562
46. Zhou W, Rousset F, O'Neil S. Phylogeny and PCR-based classification of *Wolbachia* strains using wsp gene sequences. Proc Biol Sci. 1998/05/07. 1998;265: 509–515.  
doi:10.1098/rspb.1998.0324
47. de Oliveira CD, Goncalves DS, Baton LA, Shimabukuro PH, Carvalho FD, Moreira LA. Broader prevalence of *Wolbachia* in insects including potential human disease vectors. Bull Entomol Res. 2015;105: 305–315. doi:10.1017/S0007485315000085
48. Kyalo D, Amratia P, Mundia CW, Mbogo CM, Coetzee M, Snow RW. A geo-coded inventory of anophelines in the Afrotropical Region south of the Sahara: 1898-2016. Wellcome Open Res. 2017;2: 57. doi:10.12688/wellcomeopenres.12187.1
49. Wiebe A, Longbottom J, Gleave K, Shearer FM, Sinka ME, Massey NC, et al. Geographical distributions of African malaria vector sibling species and evidence for insecticide resistance.



- Malar J. 2017;16. doi:10.1186/s12936-017-1734-y
50. Tiffany A, Moundekeno FP, Traoré A, Haile M, Sterk E, Guilavogui T, et al. Encouraging impact following 2.5 years of reinforced malaria control interventions in a hyperendemic region of the Republic of Guinea. Malar J. 2016; doi:10.1186/s12936-016-1353-z
51. Riveron JM, Watsenga F, Irving H, Irish SR, Wondji CS. High Plasmodium Infection Rate and Reduced Bed Net Efficacy in Multiple Insecticide-Resistant Malaria Vectors in Kinshasa, Democratic Republic of Congo. J Infect Dis. 2018; doi:10.1093/infdis/jix570
52. Erlank E, Koekemoer LL, Coetzee M. The importance of morphological identification of African anopheline mosquitoes (Diptera: Culicidae) for malaria control programmes. Malaria Journal. 2018. doi:10.1186/s12936-018-2189-5
53. Tabue RN, Awono-Ambene P, Etang J, Atangana J, Antonio-Nkondjio C, Toto JC, et al. Role of Anopheles (Cellia) rufipes (Gough, 1910) and other local anophelines in human malaria transmission in the northern savannah of Cameroon: a cross-sectional survey. Parasites and Vectors. 2017; doi:10.1186/s13071-016-1933-3
54. Buck M, Nilsson LKJ, Brunius C, Dabiré RK, Hopkins R, Terenius O. Bacterial associations reveal spatial population dynamics in Anopheles gambiae mosquitoes. Sci Rep. 2016; doi:10.1038/srep22806
55. Muturi EJ, Ramirez JL, Rooney AP, Kim C-H. Comparative analysis of gut microbiota of mosquito communities in central Illinois. PLoS Negl Trop Dis. 2017; doi:10.1371/journal.pntd.0005377
56. Shaw WR, Marcenac P, Childs LM, Buckee CO, Baldini F, Sawadogo SP, et al. Wolbachia infections in natural Anopheles populations affect egg laying and negatively correlate with Plasmodium development. Nat Commun. 2016;7. doi:10.1038/ncomms11772
57. Antonio-Nkondjio C, Simard F, Awono-Ambene P, Ngassam P, Toto JC, Tchuinkam T, et al. Malaria vectors and urbanization in the equatorial forest region of south Cameroon. Trans R Soc Trop Med Hyg. 2005;99: 347–354. doi:10.1016/j.trstmh.2004.07.003
58. Cano J, Descalzo MÁ, Moreno M, Chen Z, Nzambo S, Bobuakasi L, et al. Spatial variability in the density, distribution and vectorial capacity of anopheline species in a high transmission village (Equatorial Guinea). Malar J. 2006;5: 1–10. doi:10.1186/1475-2875-5-1
59. Makanga B, Yangari P, Rahola N, Rougeron V, Elguero E, Boundenga L, et al. Ape malaria

- transmission and potential for ape-to-human transfers in Africa. *Proc Natl Acad Sci.* 2016;113: 5329–5334. doi:10.1073/pnas.1603008113
60. Antonio-Nkondjio C, Ndo C, Kengne P, Mukwaya L, Awono-Ambene P, Fontenille D, et al. Population structure of the malaria vector *Anopheles moucheti* in the equatorial forest region of Africa. *Malar J.* 2008;7. doi:10.1186/1475-2875-7-120
61. Fouet C, Kamdem C, Gamez S, White BJ. Extensive genetic diversity among populations of the malaria mosquito *Anopheles moucheti* revealed by population genomics. *Infect Genet Evol.* 2017;48: 27–33. doi:10.1016/j.meegid.2016.12.006
62. Stevenson J, St. Laurent B, Lobo NF, Cooke MK, Kahindi SC, Oriango RM, et al. Novel vectors of malaria parasites in the western highlands of Kenya. *Emerging Infectious Diseases.* 2012. pp. 1547–1549. doi:org/10.3201/eid1809.120283
63. Minard G, Tran F-H, Dubost A, Tran-Van V, Mavingui P, Valiente Moro C. Pyrosequencing 16S rRNA genes of bacteria associated with wild tiger mosquito *Aedes albopictus*: a pilot study. *Front Cell Infect Microbiol.* 2014; doi:10.3389/fcimb.2014.00059
64. Hegde S, Khanipov K, Albayrak L, Golovko G, Pimenova M, Saldana MA, et al. Microbiome interaction networks and community structure from lab reared and field-collected *Aedes aegypti*, *Aedes albopictus*, and *Culex quinquefasciatus* mosquito vectors. *bioRxiv.* 2018; Available: <http://dx.doi.org/10.1101/337311>
65. Walker T, Johnson PH, Moreira LA, Iturbe-Ormaetxe I, Frentiu FD, McMeniman CJ, et al. The wMel *Wolbachia* strain blocks dengue and invades caged *Aedes aegypti* populations. *Nature.* 2011/08/26. 2011;476: 450–453. doi:10.1038/nature10355
66. Joubert DA, Walker T, Carrington LB, De Bruyne JT, Kien DHT, Hoang NLT, et al. Establishment of a *Wolbachia* Superinfection in *Aedes aegypti* Mosquitoes as a Potential Approach for Future Resistance Management. *PLoS Pathog.* 2016;12. doi:10.1371/journal.ppat.1005434
67. Dutra HLC, Rocha MN, Dias FBS, Mansur SB, Caragata EP, Moreira LA. *Wolbachia* Blocks Currently Circulating Zika Virus Isolates in Brazilian *Aedes aegypti* Mosquitoes. *Cell Host and Microbe.* 2016. pp. 771–774. doi:10.1016/j.chom.2016.04.021
68. van den Hurk AF, Hall-Mendelin S, Pyke AT, Frentiu FD, McElroy K, Day A, et al. Impact of *Wolbachia* on infection with chikungunya and yellow fever viruses in the mosquito vector

- Aedes aegypti. PLoS Negl Trop Dis. 2012/11/08. 2012;6: e1892.  
doi:10.1371/journal.pntd.0001892
69. Tantely ML, Rakotoniaina JC, Tata E, Andrianaivolambo L, Razafindrasata F, Fontenille D, et al. Biology of mosquitoes that are potential vectors of Rift Valley Fever virus in different biotopes of the central highlands of Madagascar. J Med Entomol. 2013;50: 603–610.  
doi:10.1603/ME12069
70. Scott JA, Brogdon WG, Collins FH. Identification of1 Scott JA, Brogdon WG, Collins FH. Identification of single specimens of the Anopheles gambiae complex by the polymerase chain reaction. Am J Trop Med Hyg. 1993;49: 520–529.
71. Santolamazza F, Mancini E, Simard F, Qi Y, Tu Z, della Torre A. Insertion polymorphisms of SINE200 retrotransposons within speciation islands of Anopheles gambiae molecular forms. Malar J. 2008/08/30. 2008;7: 163. doi:10.1186/1475-2875-7-163
72. Bass C, Williamson MS, Field LM. Development of a multiplex real-time PCR assay for identification of members of the Anopheles gambiae species complex. Acta Trop. 2008/05/21. 2008;107: 50–53. doi:10.1016/j.actatropica.2008.04.009
73. Cohuet A, Simard F, Toto JC, Kengne P, Coetzee M, Fontenille D. Species identification within the Anopheles funestus group of malaria vectors in Cameroon and evidence for a new species. Am J Trop Med Hyg. 2003/09/19. 2003;69: 200–205. Available: <http://www.ncbi.nlm.nih.gov/pubmed/13677376>
74. Beebe NW, Saul A. Discrimination of all members of the Anopheles punctulatus complex by polymerase chain reaction--restriction fragment length polymorphism analysis. Am J Trop Med Hyg. 1995/11/01. 1995;53: 478–481. Available: <http://www.ncbi.nlm.nih.gov/pubmed/7485705>
75. Marie A, Boissiere A, Tsapi MT, Poinson A, Awono-Ambene PH, Morlais I, et al. Evaluation of a real-time quantitative PCR to measure the wild Plasmodium falciparum infectivity rate in salivary glands of Anopheles gambiae. Malar J. 2013/07/04. 2013;12: 224. doi:10.1186/1475-2875-12-224
76. Yamada Y, Katsura K, Kawasaki H, Widyastuti Y, Saono S, Seki T, et al. Asaia bogorensis gen. nov., sp. nov., an unusual acetic acid bacterium in the alpha-Proteobacteria. Int J Syst Evol Microbiol. 2000;50 Pt 2: 823–829. doi:10.1099/00207713-50-2-823
77. Favia G, Ricci I, Damiani C, Raddadi N, Crotti E, Marzorati M, et al. Bacteria of the genus

- Asaia stably associate with *Anopheles stephensi*, an Asian malarial mosquito vector. *Proc Natl Acad Sci.* 2007;104: 9047–9051. doi:10.1073/pnas.0610451104
78. Holt RA, Subramanian GM, Halpern A, Sutton GG, Charlab R, Nusskern DR, et al. The genome sequence of the malaria mosquito *Anopheles gambiae*. *Science* (80- ). 2002;298: 129. doi:10.1126/science.1076181
79. Coggins SA, Estevez-Lao TY, Hillyer JF. Increased survivorship following bacterial infection by the mosquito *Aedes aegypti* as compared to *Anopheles gambiae* correlates with increased transcriptional induction of antimicrobial peptides. *Dev Comp Immunol.* 2012/02/14. 2012;37: 390–401. doi:10.1016/j.dci.2012.01.005
80. Werren JH, Windsor DM. Wolbachia infection frequencies in insects: evidence of a global equilibrium? *Proc Biol Sci.* 2000/09/06. 2000;267: 1277–1285. doi:10.1098/rspb.2000.1139
81. de Oliveira CD, Goncalves DS, Baton LA, Shimabukuro PH, Carvalho FD, Moreira LA. Broader prevalence of Wolbachia in insects including potential human disease vectors. *Bull Entomol Res.* 2015;105: 305–315. doi:10.1017/S0007485315000085
82. Baldo L, Bordenstein S, Wernegreen JJ, Werren JH. Widespread recombination throughout Wolbachia genomes. *Mol Biol Evol.* 2005/11/04. 2006;23: 437–449. doi:10.1093/molbev/msj049
83. Kumar S, Stecher G, Tamura K. MEGA7: Molecular Evolutionary Genetics Analysis Version 7.0 for Bigger Datasets. *Mol Biol Evol.* 2016;33: 1870–1874. doi:10.1093/molbev/msw054
84. Jolley KA, Chan MS, Maiden MCJ. mlstdbNet - Distributed multi-locus sequence typing (MLST) databases. *BMC Bioinformatics.* 2004;5. doi:10.1186/1471-2105-5-86
85. Klindworth A, Pruesse E, Schweer T, Peplies J, Quast C, Horn M, et al. Evaluation of general 16S ribosomal RNA gene PCR primers for classical and next-generation sequencing-based diversity studies. *Nucleic Acids Res.* 2013;41. doi:10.1093/nar/gks808
86. Quast C, Pruesse E, Yilmaz P, Gerken J, Schweer T, Yarza P, et al. The SILVA ribosomal RNA gene database project: Improved data processing and web-based tools. *Nucleic Acids Res.* 2013;41. doi:10.1093/nar/gks1219
87. Tamura K, Nei M. Estimation of the number of nucleotide substitutions in the control region of mitochondrial DNA in humans and chimpanzees. *Mol Biol Evol.* 1993;10: 512–26. doi:10.1093/molbev/msl149

## Figure legends

**Figure 1. Locations of *Anopheles* species collections (including *Wolbachia*-infected species) and *P. falciparum* malaria prevalence rates (across all species for each location).** **A)** Overall map showing the five malaria-endemic countries where mosquito collections were undertaken. **B)** High malaria prevalence rates in Guinea and *Wolbachia*-infected *An. coluzzii* from Ghana (no *P. falciparum* detected). **C)** *Wolbachia* strains in *An. gambiae* s.s., *An. species A* and *An. moucheti* from DRC and variable *P. falciparum* prevalence rate in DRC and Uganda. **D)** Low *P. falciparum* infection rates in Madagascar and no evidence of resident *Wolbachia* strains. (W+; *Wolbachia* detected in this species)

**Figure 2. Maximum Likelihood molecular phylogenetic analysis of *Anopheles gambiae* complex ITS2 sequences from field-collected mosquitoes.** The tree with the highest log likelihood (-817.61) is shown. The tree is drawn to scale, with branch lengths measured in the number of substitutions per site. The analysis involved 41 nucleotide sequences. There were a total of 476 positions in the final dataset. MAD = Madagascar; UGA = Uganda; DRC = Democratic Republic of Congo; GUI = Guinea, GHA = Ghana. (W+; individual was *Wolbachia* positive, W-; individual was *Wolbachia* negative)

**Figure 3. Maximum Likelihood molecular phylogenetic analysis of *Anopheles* ITS2 sequences from field-collected mosquitoes outside of the *An. gambiae* s.l. complex.** The tree with the highest log likelihood (-2882.16) is shown. The tree is drawn to scale, with branch lengths measured in the number of substitutions per site. The analysis involved 120 nucleotide sequences. There were a total of 144 positions in the final dataset. MAD = Madagascar; UGA = Uganda; DRC = Democratic Republic of Congo; GUI = Guinea. *An. sp. A/1* (W+) DRC-1, *An. sp. A/1* (W+) DRC-2, *An. sp. A/1* (W+) DRC-3 were collected from Lwiro and *An. sp. A/1* (W+) DRC-4, *An. sp. A/1* (W+) DRC-5 were collected from Katana. (W+; individual was *Wolbachia* positive, W-; individual was *Wolbachia* negative)

**Figure 4. Resident *Wolbachia* strain phylogenetic analysis using 16S rRNA and *wsp* genes.** **A)** Maximum Likelihood molecular phylogenetic analysis of the 16S rRNA gene for resident strains in *An. coluzzii*, *An. moucheti* and *An. species A*. The tree with the highest log likelihood (-681.38) is shown. The tree is drawn to scale, with branch lengths measured in the number of substitutions per site. The analysis involved 17 nucleotide sequences.. There were a total of 335 positions in the final dataset. **B)** Maximum Likelihood molecular phylogenetic analysis of the *wsp* gene for strain variants wAnsA1 and wAnsA2. The tree with the highest log likelihood (-2767.17) is shown. The tree is drawn to scale, with branch lengths measured in the number of substitutions per site. The analysis involved 21 nucleotide sequences. There were a total of 458 positions in the final dataset.



**Figure 5. *Wolbachia* MLST phylogenetic analysis of resident *Wolbachia* strains in *An. coluzzii*, *An. moucheti* and *An. species A*.** **A)** Maximum Likelihood molecular phylogenetic analysis from concatenation of all five MLST gene loci showing the tree with the highest log likelihood (-10606.13). The tree is drawn to scale, with branch lengths measured in the number of substitutions per site. The analysis involved 94 nucleotide sequences.. There were a total of 2067 positions in the final dataset. Concatenated sequence data from *Wolbachia* strains downloaded from MLST database for comparison shown in black and navy blue with isolate numbers from MLST database shown in brackets. *Wolbachia* strains isolated from mosquito species highlighted in navy blue. **B).** Maximum Likelihood molecular phylogenetic analysis for *coxA* gene locus showing the tree with the highest log likelihood (-1930.77). The tree is drawn to scale, with branch lengths measured in the number of substitutions per site. The analysis involved 84 nucleotide sequences. There were a total of 400 positions in the final dataset. Sequence data for *coxA* locus from *Wolbachia* strains downloaded from MLST database for comparison shown in black and navy blue with isolate numbers from MLST database shown in brackets. *Wolbachia* strains isolated from mosquito species highlighted in navy blue. Genbank sequence for wAnga-Mali *coxA* shown in maroon with accession number.

**Figure 6. The relative abundance of resident *Wolbachia* strains in *Anopheles*.** Bacterial genus level taxonomy was assigned to OTUs clustered with a 97% cut-off using the SILVA SSU v128 97% database, and individual genera comprising less than 1% of total abundance was merged into “Others”.

**Figure 7. The relative abundance of bacteria in *An. gambiae* s.s. comparing two locations with contrasting *Asaia* infection densities.** Bacterial genus level taxonomy was assigned to OTUs clustered with a 97% cut-off using the SILVA SSU v128 97% database, and individual genera comprising less than 1% of total abundance was merged into “Others”.

**Supplementary Figure S1. Alpha and beta diversity of *An. gambiae* s.s. from Kissidougou, Guinea and Butemba, Uganda.** **A)** Alpha diversity using the Shannon diversity index shows the relative abundance of bacterial genera. **B)** To identify dissimilarities in the bacterial community structure between the microbiome, principal coordinates analysis (PCoA) was performed based on a Bray-Curtis dissimilarity matrix based on 97% clustered OTUs.

**Supplementary Figure S2. Prevalence of the bacterial endosymbiont *Asaia* and malaria parasites in *An. gambiae* s.s. mosquitoes from Guinea.** **A)** Normalised *P. falciparum*: *An. gambiae* gene Ct ratio for mosquitoes that are infected with malaria and +/- *Asaia* bacteria. **B)** *P. falciparum* infection rates in *An. gambiae* s.s. females with and without *Asaia*. **C)** Box and whisker plot of Ct values for detection of *Asaia* and *P. falciparum* malaria showing more variable levels of *Asaia* detected.

**Table 1.** *Anopheles* mosquito species collected from locations within five malaria-endemic countries and *P. falciparum*, *Wolbachia* and *Asaia* prevalence rates. Species in different locations infected with *Wolbachia* are in bold. \*Adult individuals from Lwiro (Katana), DRC were collected as both larvae and adults so have been excluded from *P. falciparum* and *Asaia* prevalence analysis.

| Country    | Location       | Species                      | Individuals | Infection prevalence (%) |                  |              |
|------------|----------------|------------------------------|-------------|--------------------------|------------------|--------------|
|            |                |                              |             | <i>P. falciparum</i>     | <i>Wolbachia</i> | <i>Asaia</i> |
| Guinea     | Faranah        | <i>An. gambiae ss</i>        | 48          | 43.8                     | 0.0              | 50.0         |
|            |                | <i>An. arabiensis</i>        | 7           | 0.0                      | 0.0              | 100.0        |
|            |                | <i>An. nili</i>              | 9           | 0.0                      | 0.0              | 100.0        |
|            | Kissidougou    | <i>An. gambiae ss</i>        | 44          | 18.2                     | 0.0              | 100.0        |
|            |                | <i>An. spp O</i>             | 1           | 0.0                      | 0.0              | 100.0        |
|            | Boke           | <i>An. gambiae ss</i>        | 21          | 52.4                     | 0.0              | 28.6         |
|            | Kankan         | <i>An. gambiae ss</i>        | 48          | 38.1                     | 0.0              | 56.3         |
|            |                | <i>An. spp unknown</i>       | 1           | 0.0                      | 0.0              | 0.0          |
| DRC        | Mikalayi       | <b><i>An. gambiae ss</i></b> | 16          | 29.4                     | 11.8             | 11.8         |
|            |                | <b><i>An. moucheti</i></b>   | 1           | 0.0                      | 100.0            | 0.0          |
|            |                | <i>An. funestus ss</i>       | 13          | 30.8                     | 0.0              | 15.4         |
|            | Kisangani      | <i>An. gambiae ss</i>        | 25          | 12.0                     | 8.0              | 20.0         |
|            |                | <i>An. arabiensis</i>        | 4           | 25.0                     | 0.0              | 0.0          |
|            | Katana         | <i>An. gambiae ss</i>        | 23          | 8.7                      | 8.7              | 4.4          |
|            |                | <i>An. funestus ss</i>       | 5           | 0.0                      | 0.0              | 0.0          |
|            |                | <b><i>An. species A</i></b>  | 2           | 50.0                     | 100.0            | 0.0          |
|            | Lwiro (Katana) | <b><i>An. species A*</i></b> | 33          | na                       | 90.1             | na           |
|            | Kapolowe       | <i>An. gambiae ss</i>        | 9           | 11.1                     | 11.1             | 0.0          |
|            |                | <i>An. funestus ss</i>       | 5           | 20.0                     | 0.0              | 0.0          |
|            | Kalemi         | <b><i>An. gambiae ss</i></b> | 29          | 6.9                      | 24.1             | 3.5          |
|            |                | <i>An. arabiensis</i>        | 1           | 0.0                      | 0.0              | 0.0          |
|            | Kinshasa       | <b><i>An. gambiae ss</i></b> | 27          | 22.2                     | 14.8             | 3.7          |
|            |                | <i>An. funestus ss</i>       | 2           | 50.0                     | 0.0              | 0.0          |
| Ghana      | Dogo           | <b><i>An. coluzzii</i></b>   | 274         | 0.0                      | 4.4              | 33.2         |
|            |                | <i>An. arabiensis</i>        | 6           | 0.0                      | 0.0              | 50.0         |
|            |                | <i>An. melas</i>             | 1           | 0.0                      | 0.0              | 100.00       |
| Uganda     | Butemba (2013) | <i>An. gambiae ss</i>        | 57          | 19.3                     | 0.0              | 80.7         |
|            | Butemba (2014) | <i>An. gambiae ss</i>        | 135         | 36.3                     | 0.0              | 48.1         |
|            |                | <i>An. arabiensis</i>        | 1           | 0.0                      | 0.0              | 0.0          |
| Madagascar | Anivorano Nord | <i>An. funestus</i>          | 8           | 0.0                      | 0.0              | 25.0         |
|            |                | <i>An. gambiae ss</i>        | 3           | 0.0                      | 0.0              | 33.3         |
|            |                | <i>An. arabiensis</i>        | 2           | 0.0                      | 0.0              | 100.0        |
|            |                | <i>An. mascarensis</i>       | 38          | 0.0                      | 0.0              | 39.5         |
|            |                | <i>An. maculipalpis</i>      | 9           | 0.0                      | 0.0              | 11.1         |
|            |                | <i>An. coustani</i>          | 22          | 0.0                      | 0.0              | 27.3         |
|            |                | <i>An. rufipes</i>           | 11          | 0.0                      | 0.0              | 27.3         |
|            | Ambomiharina   | <i>An. funestus</i>          | 12          | 0.0                      | 0.0              | 83.3         |
|            |                | <i>An. pharoensis</i>        | 7           | 0.0                      | 0.0              | 42.9         |
|            |                | <i>An. rufipes</i>           | 19          | 10.5                     | 0.0              | 68.4         |
|            |                | <i>An. maculipalpis</i>      | 9           | 0.0                      | 0.0              | 0.0          |
|            |                | <i>An. gambiae ss</i>        | 8           | 0.0                      | 0.0              | 0.0          |
|            |                | <i>An. coustani</i>          | 24          | 0.0                      | 0.0              | 25.0         |
|            |                | <i>An. squamosus</i>         | 10          | 0.0                      | 0.0              | 20.0         |
|            | Antafia        | <i>An. mascarensis</i>       | 2           | 0.0                      | 0.0              | 50.0         |
|            |                | <i>An. gambiae ss</i>        | 11          | 27.3                     | 0.0              | 45.5         |
|            |                | <i>An. pauliani</i>          | 2           | 0.0                      | 0.0              | 50.0         |
|            |                | <i>An. rufipes</i>           | 2           | 0.0                      | 0.0              | 50.0         |
|            |                | <i>An. mascarensis</i>       | 2           | 0.0                      | 0.0              | 0.0          |
|            | Ambohimarina   | <i>An. funestus</i>          | 1           | 0.0                      | 0.0              | 0.0          |
|            |                | <i>An. gambiae ss</i>        | 1           | 0.0                      | 0.0              | 0.0          |
|            |                | <i>An. arabiensis</i>        | 2           | 0.0                      | 0.0              | 0.0          |
|            |                | <i>An. rufipes</i>           | 7           | 0.0                      | 0.0              | 42.9         |
|            |                | <i>An. coustani</i>          | 18          | 0.0                      | 0.0              | 11.1         |
|            |                | <i>An. maculipalpis</i>      | 8           | 0.0                      | 0.0              | 12.5         |
|            |                | <i>An. squamosus</i>         | 52          | 0.0                      | 0.0              | 3.9          |
|            |                | <i>An. mascarensis</i>       | 11          | 0.0                      | 0.0              | 0.0          |

**Table 2. Novel resident *Wolbachia* strain *wsp* and MLST gene allelic profiles.** Exact matches to existing alleles present in the database are shown in bold, novel alleles are denoted by the allele number of the closest match and shown in red (number of single nucleotide differences to the closest match). \*alternative degenerate primers (set 3) used to generate sequence. TBA; to be assigned.

| Species              | <i>Wolbachia</i> strain | <i>WSP</i>  |             |             |             |             | MLST alleles |             |             |             |             |           |
|----------------------|-------------------------|-------------|-------------|-------------|-------------|-------------|--------------|-------------|-------------|-------------|-------------|-----------|
|                      |                         | <i>wsp</i>  | <i>HVR1</i> | <i>HVR2</i> | <i>HVR3</i> | <i>HVR4</i> | <i>gatB</i>  | <i>coxA</i> | <i>hcpA</i> | <i>ftsZ</i> | <i>fbpA</i> | <i>ST</i> |
| <i>An. species A</i> | wAnsA1                  | 152<br>(34) | TBA         | TBA         | TBA         | 23          | 140<br>(4)   | 122<br>(16) | 6<br>(7)    | 7<br>(1)    | 10<br>(1)   | TBA       |
| <i>An. species A</i> | wAnsA2                  | 152<br>(34) | TBA         | TBA         | TBA         | 23          | -            | 36<br>(1)   | 6<br>(7)    | -           | -           | -         |
| <i>An. moucheti</i>  | wAnM                    | -           | -           | -           | -           | -           | 9<br>(2)     | 11<br>(1)   | 74<br>(3)   | 7<br>(2)    | 7<br>(12)   | TBA       |
| <i>An. coluzzii</i>  | wAnga-Ghana             | -           | -           | -           | -           | -           | 9            | 64          | 3*          | 177         | 4           | TBA       |

Figure 1

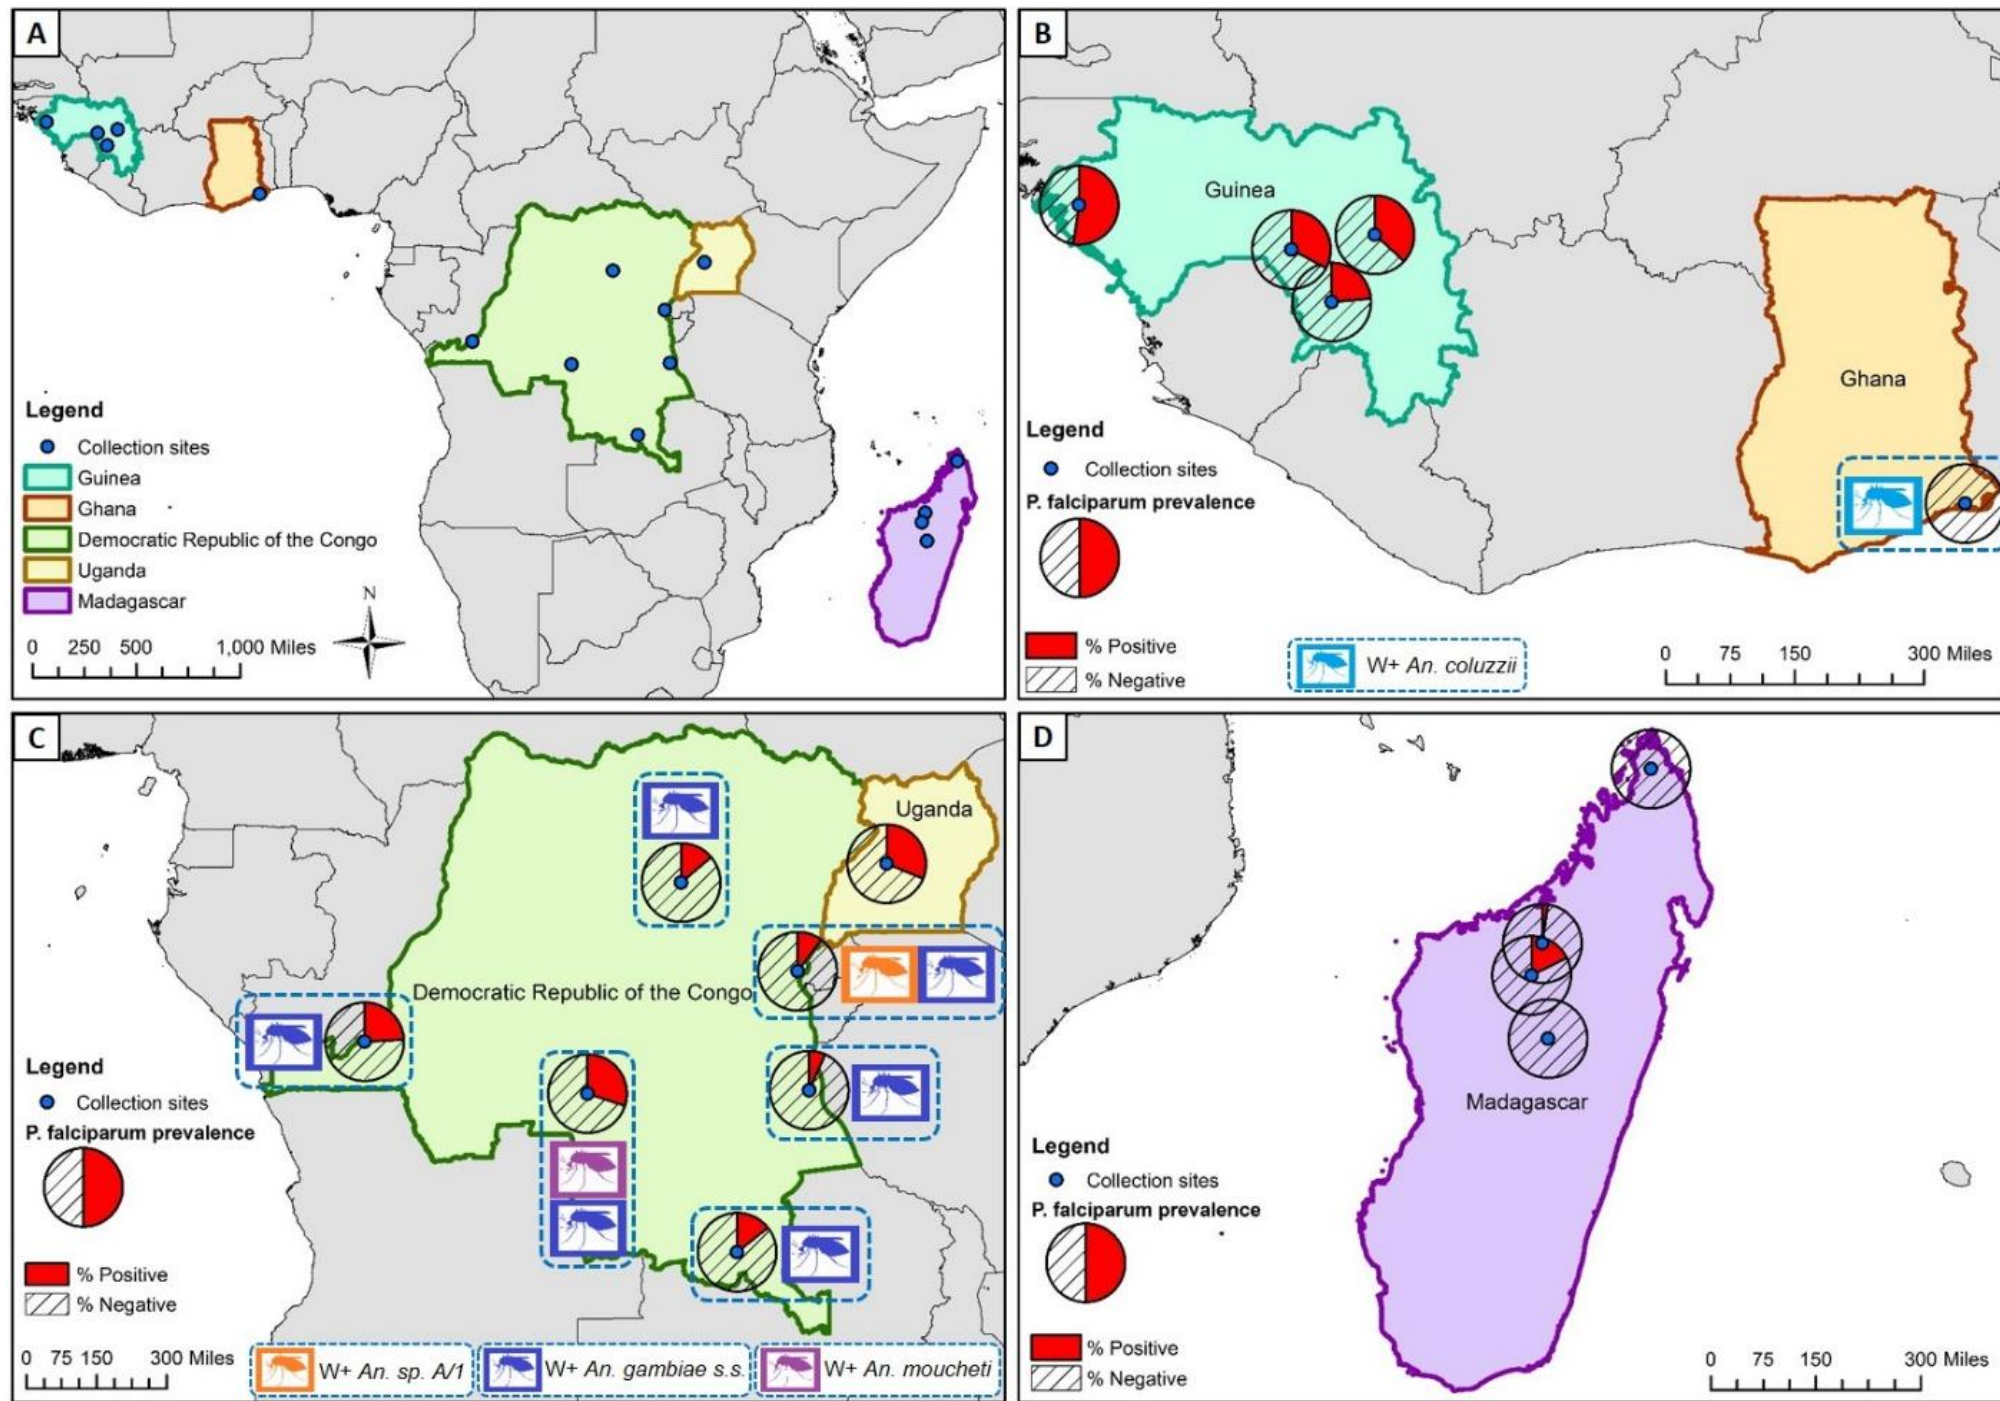

**Figure 2**

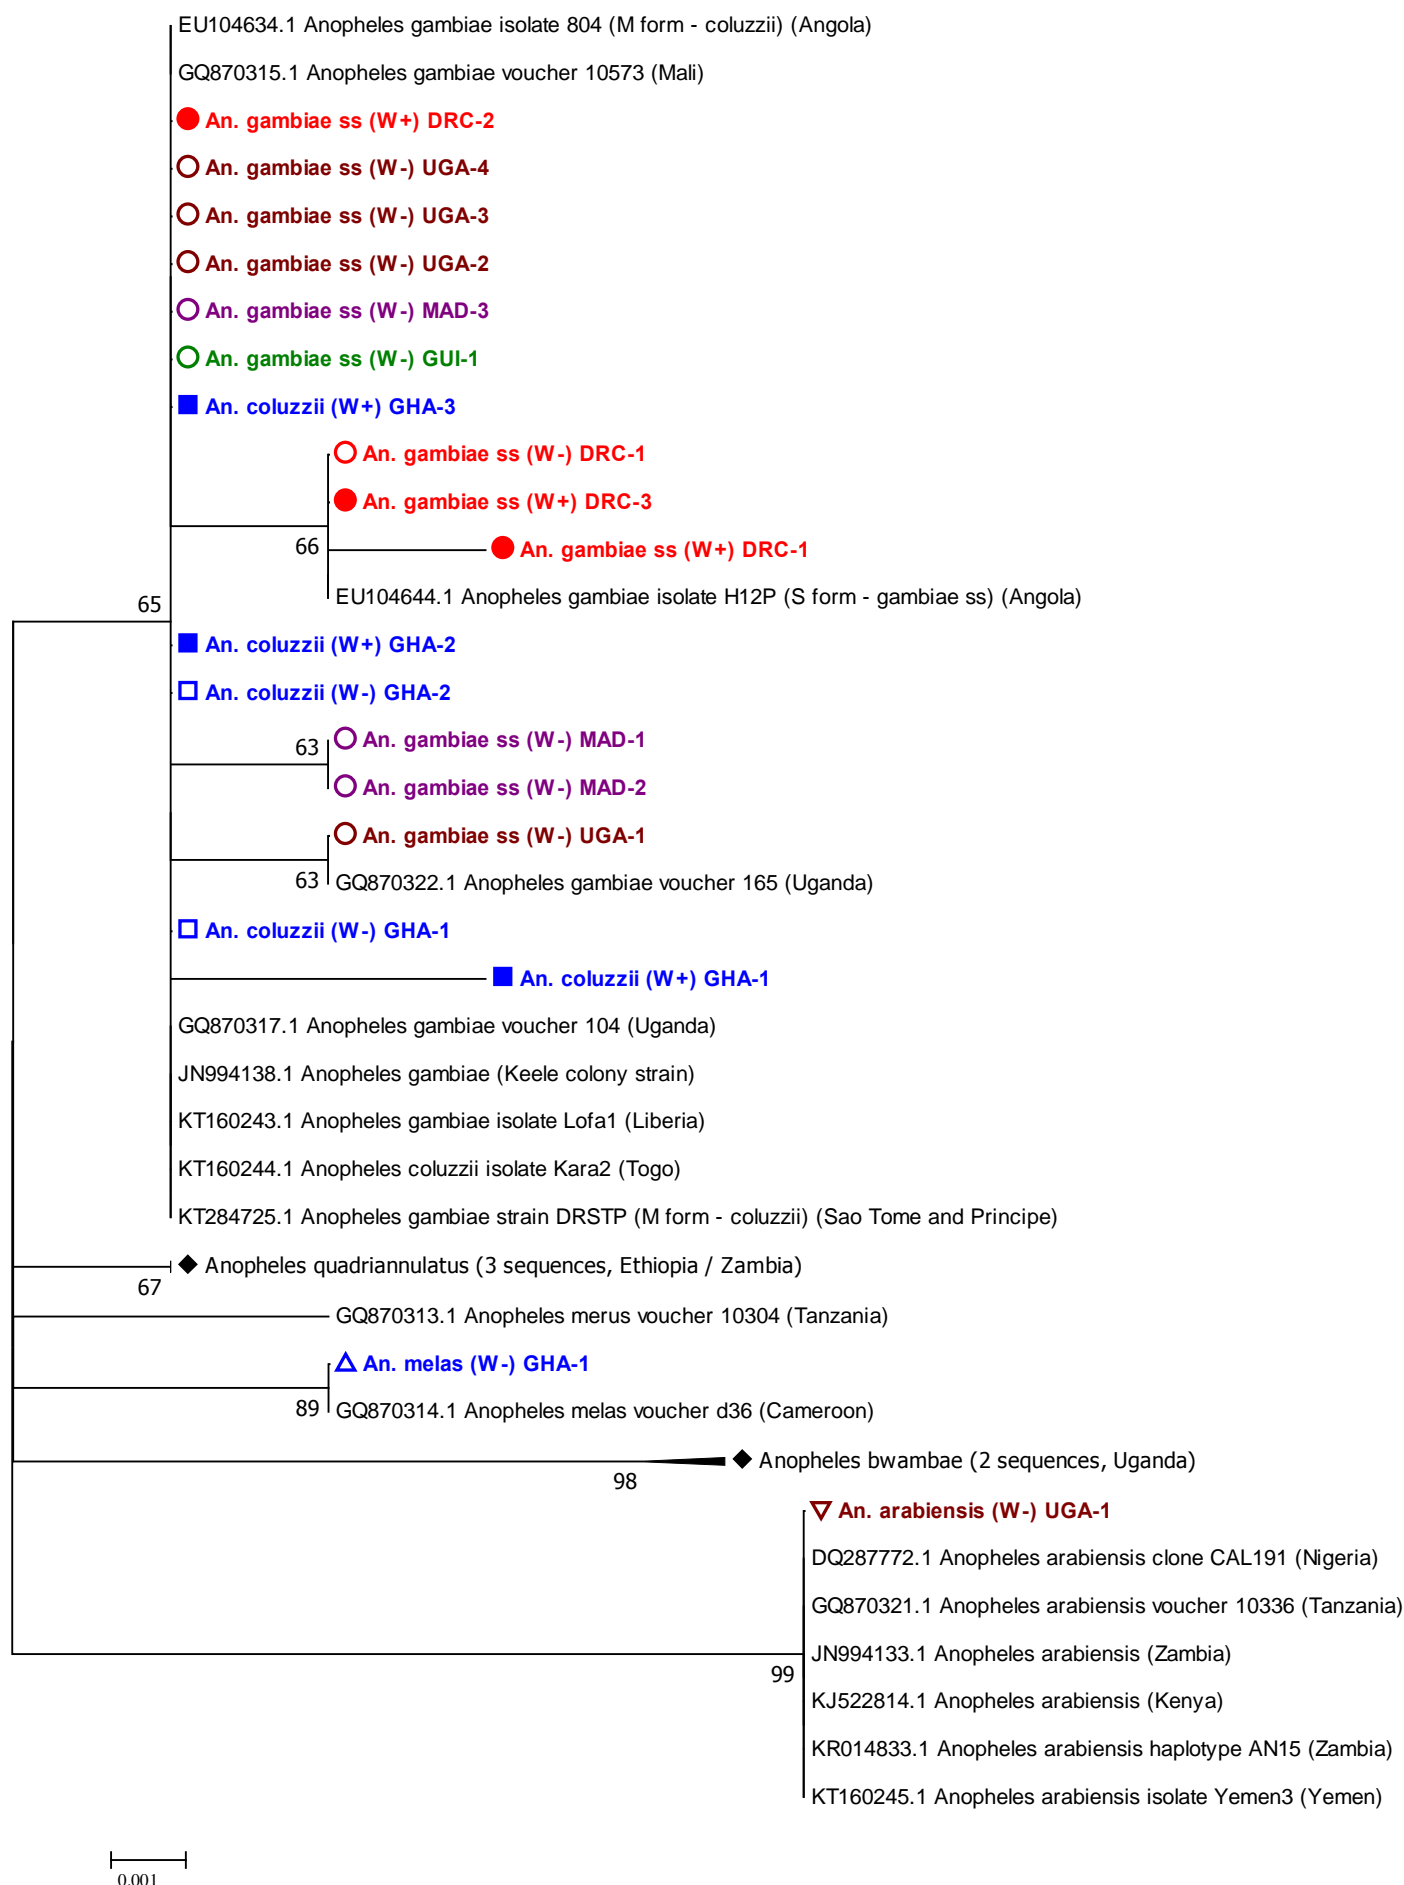



**Figure 3**

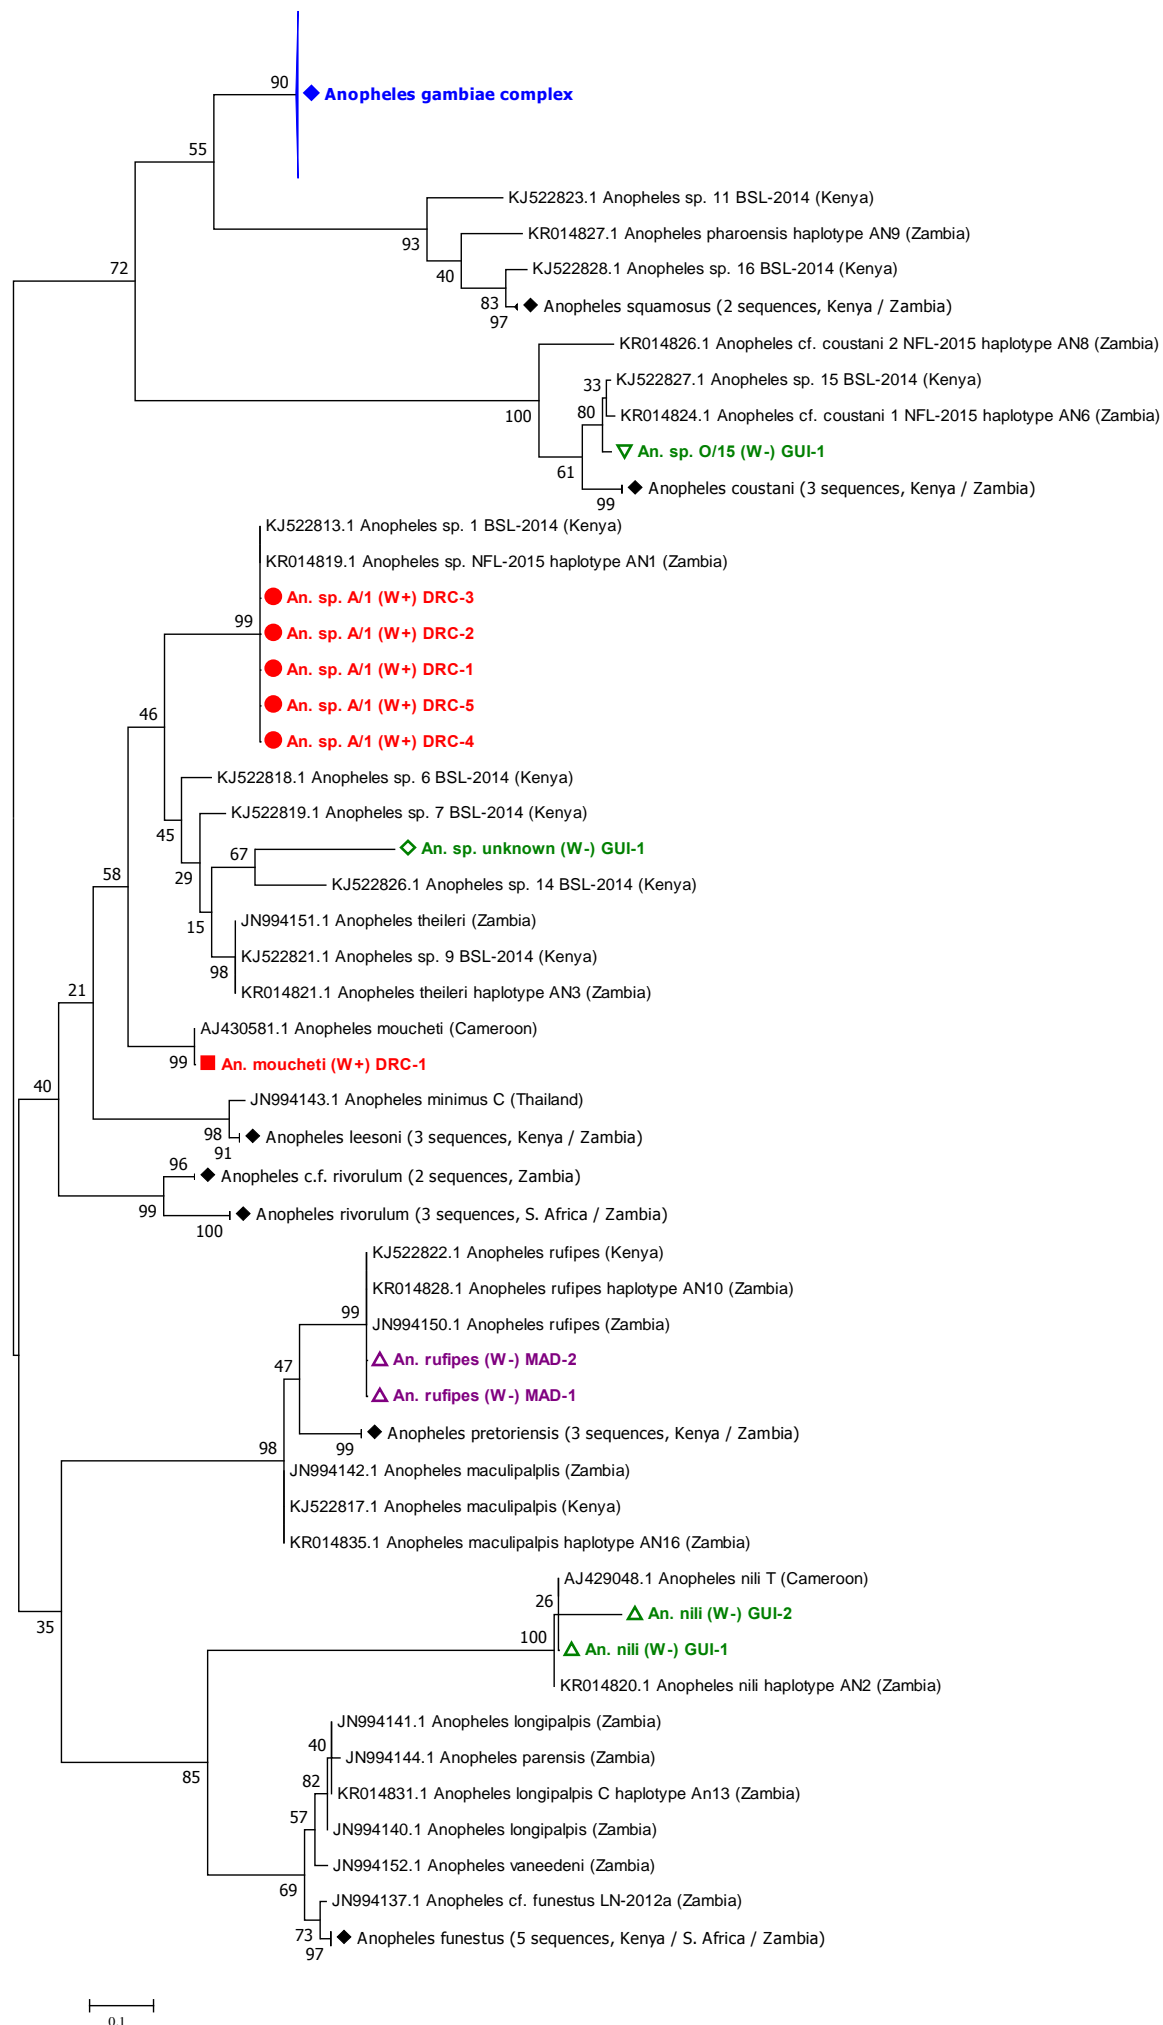

**Figure 4**

**A**

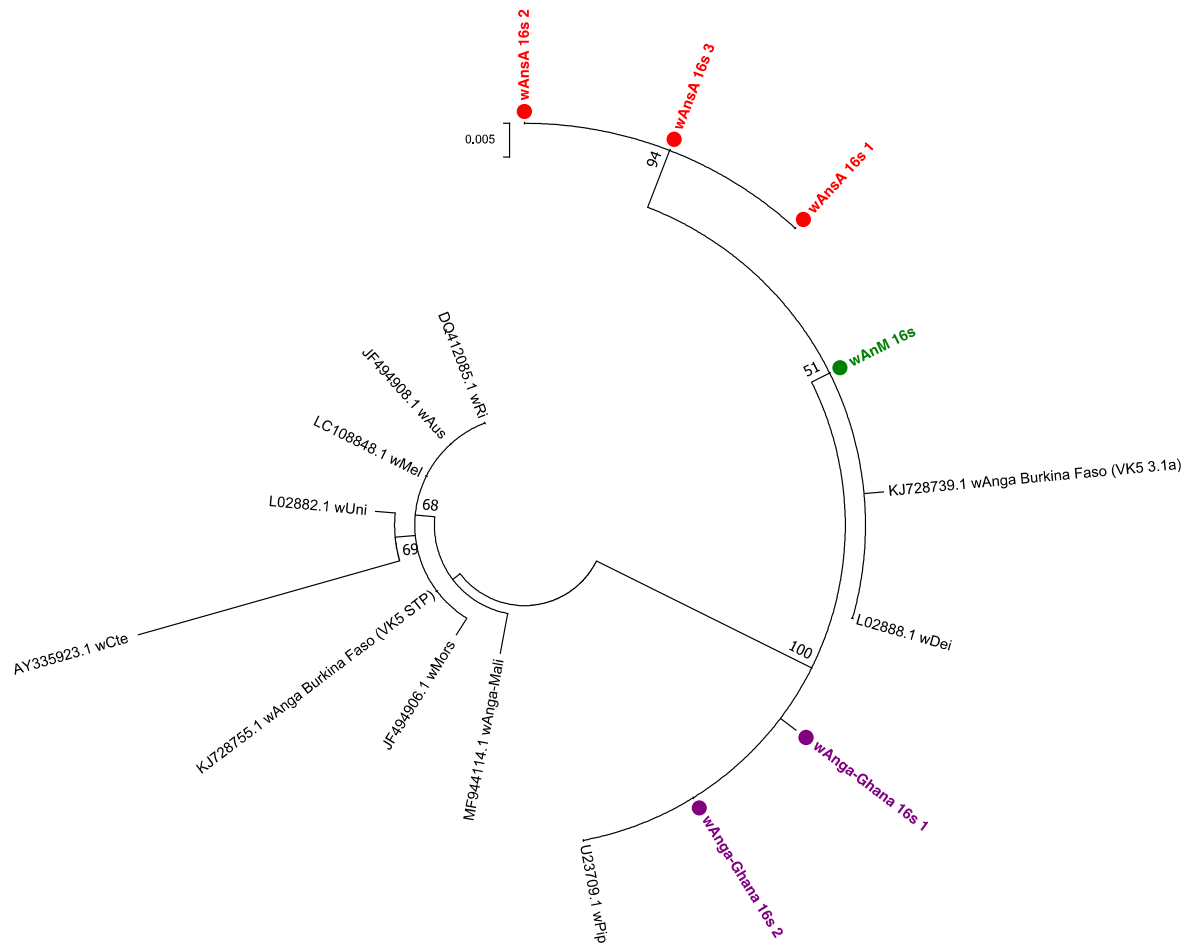

**B**

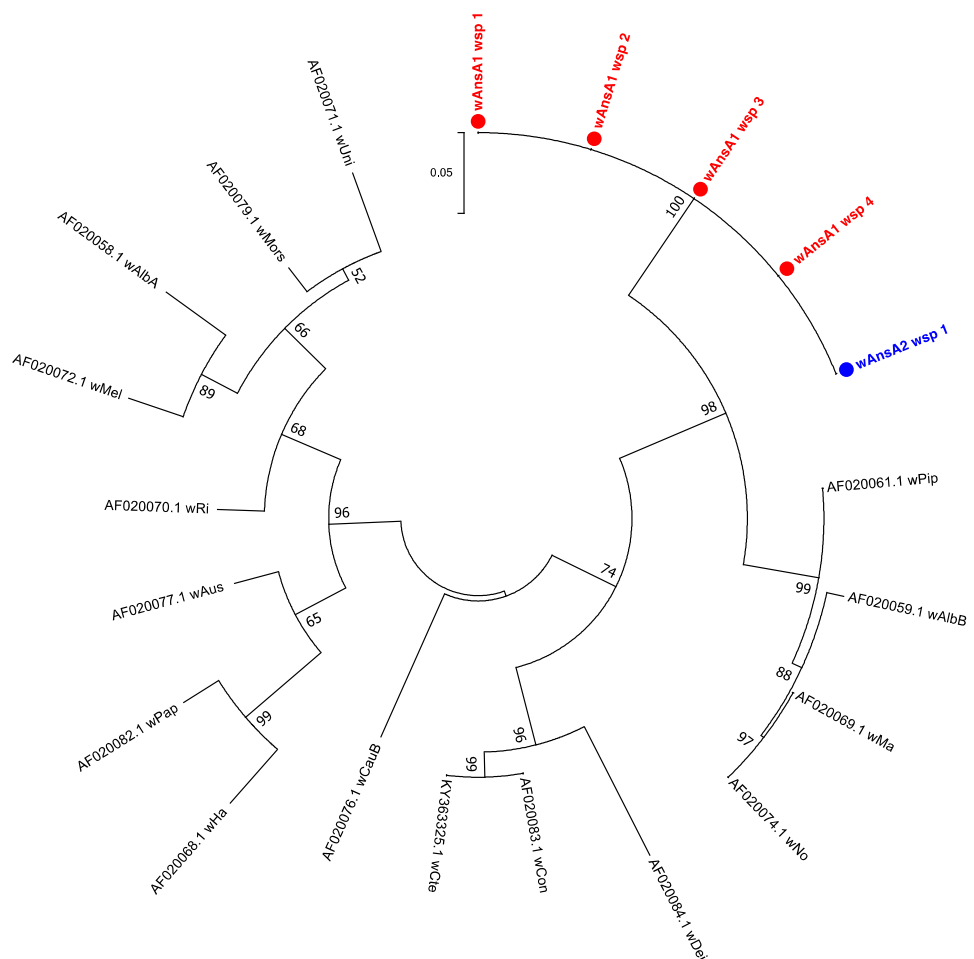

Figure 5

A

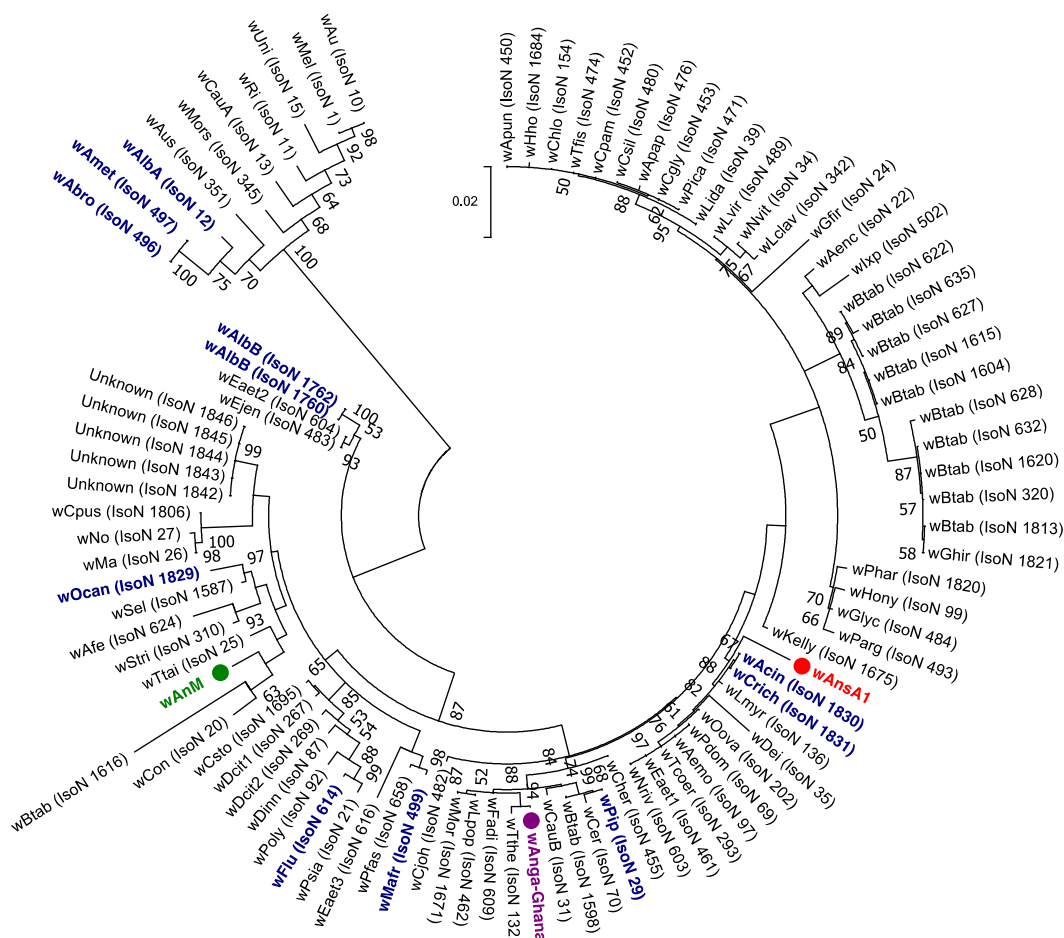

B

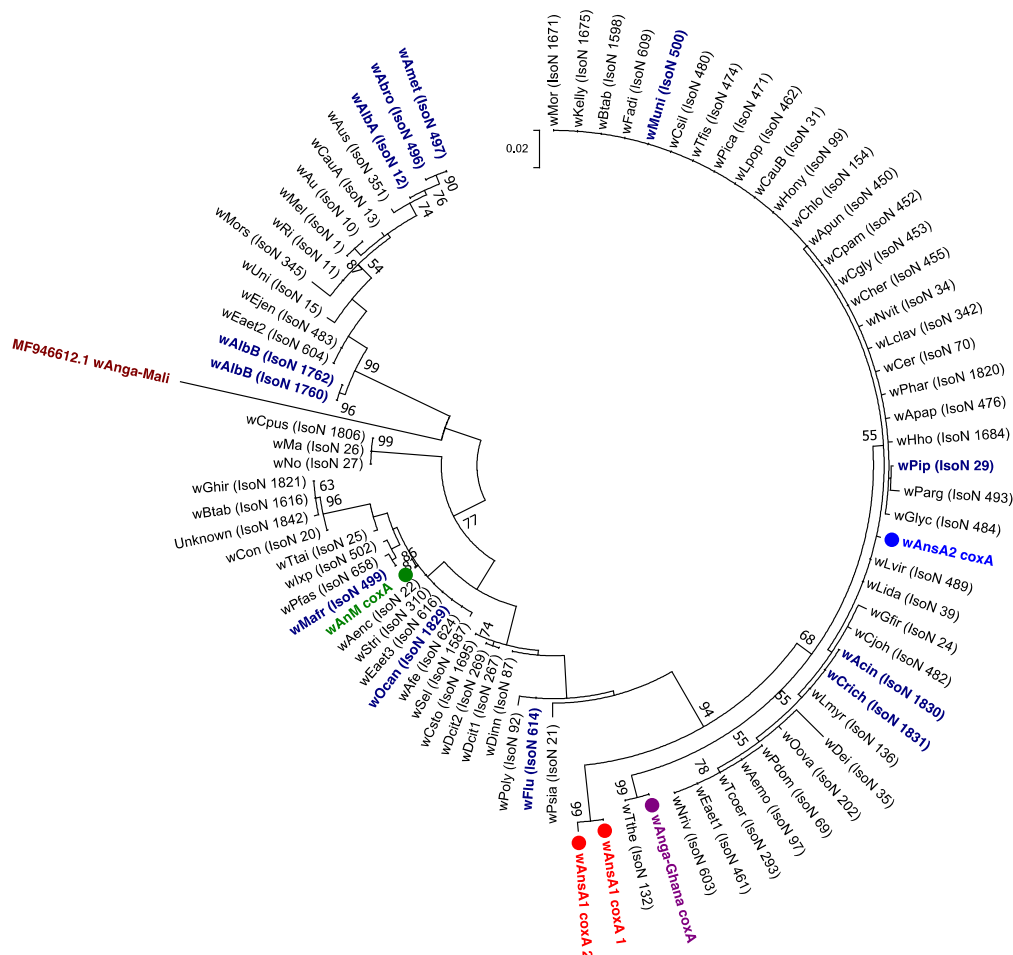

Figure 6

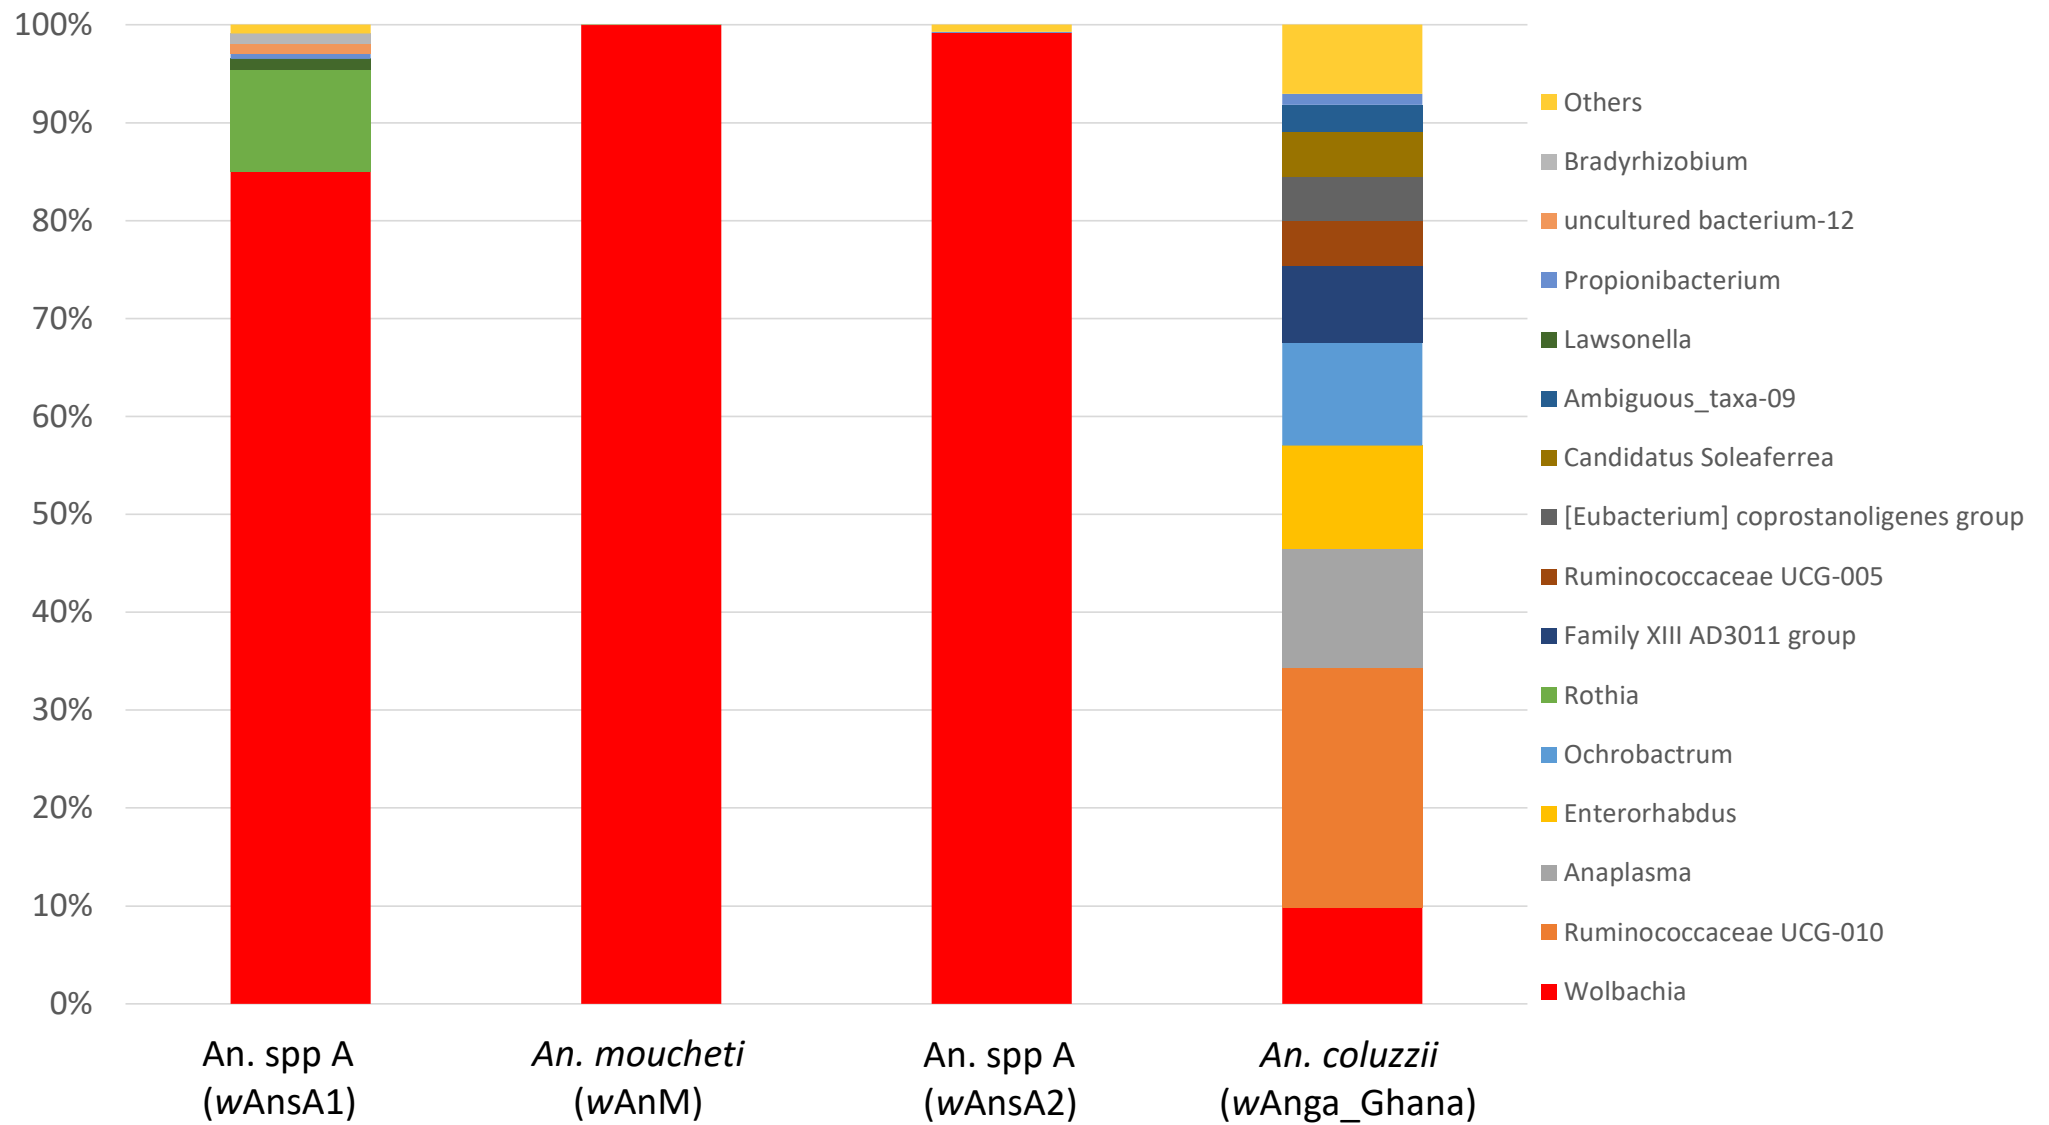

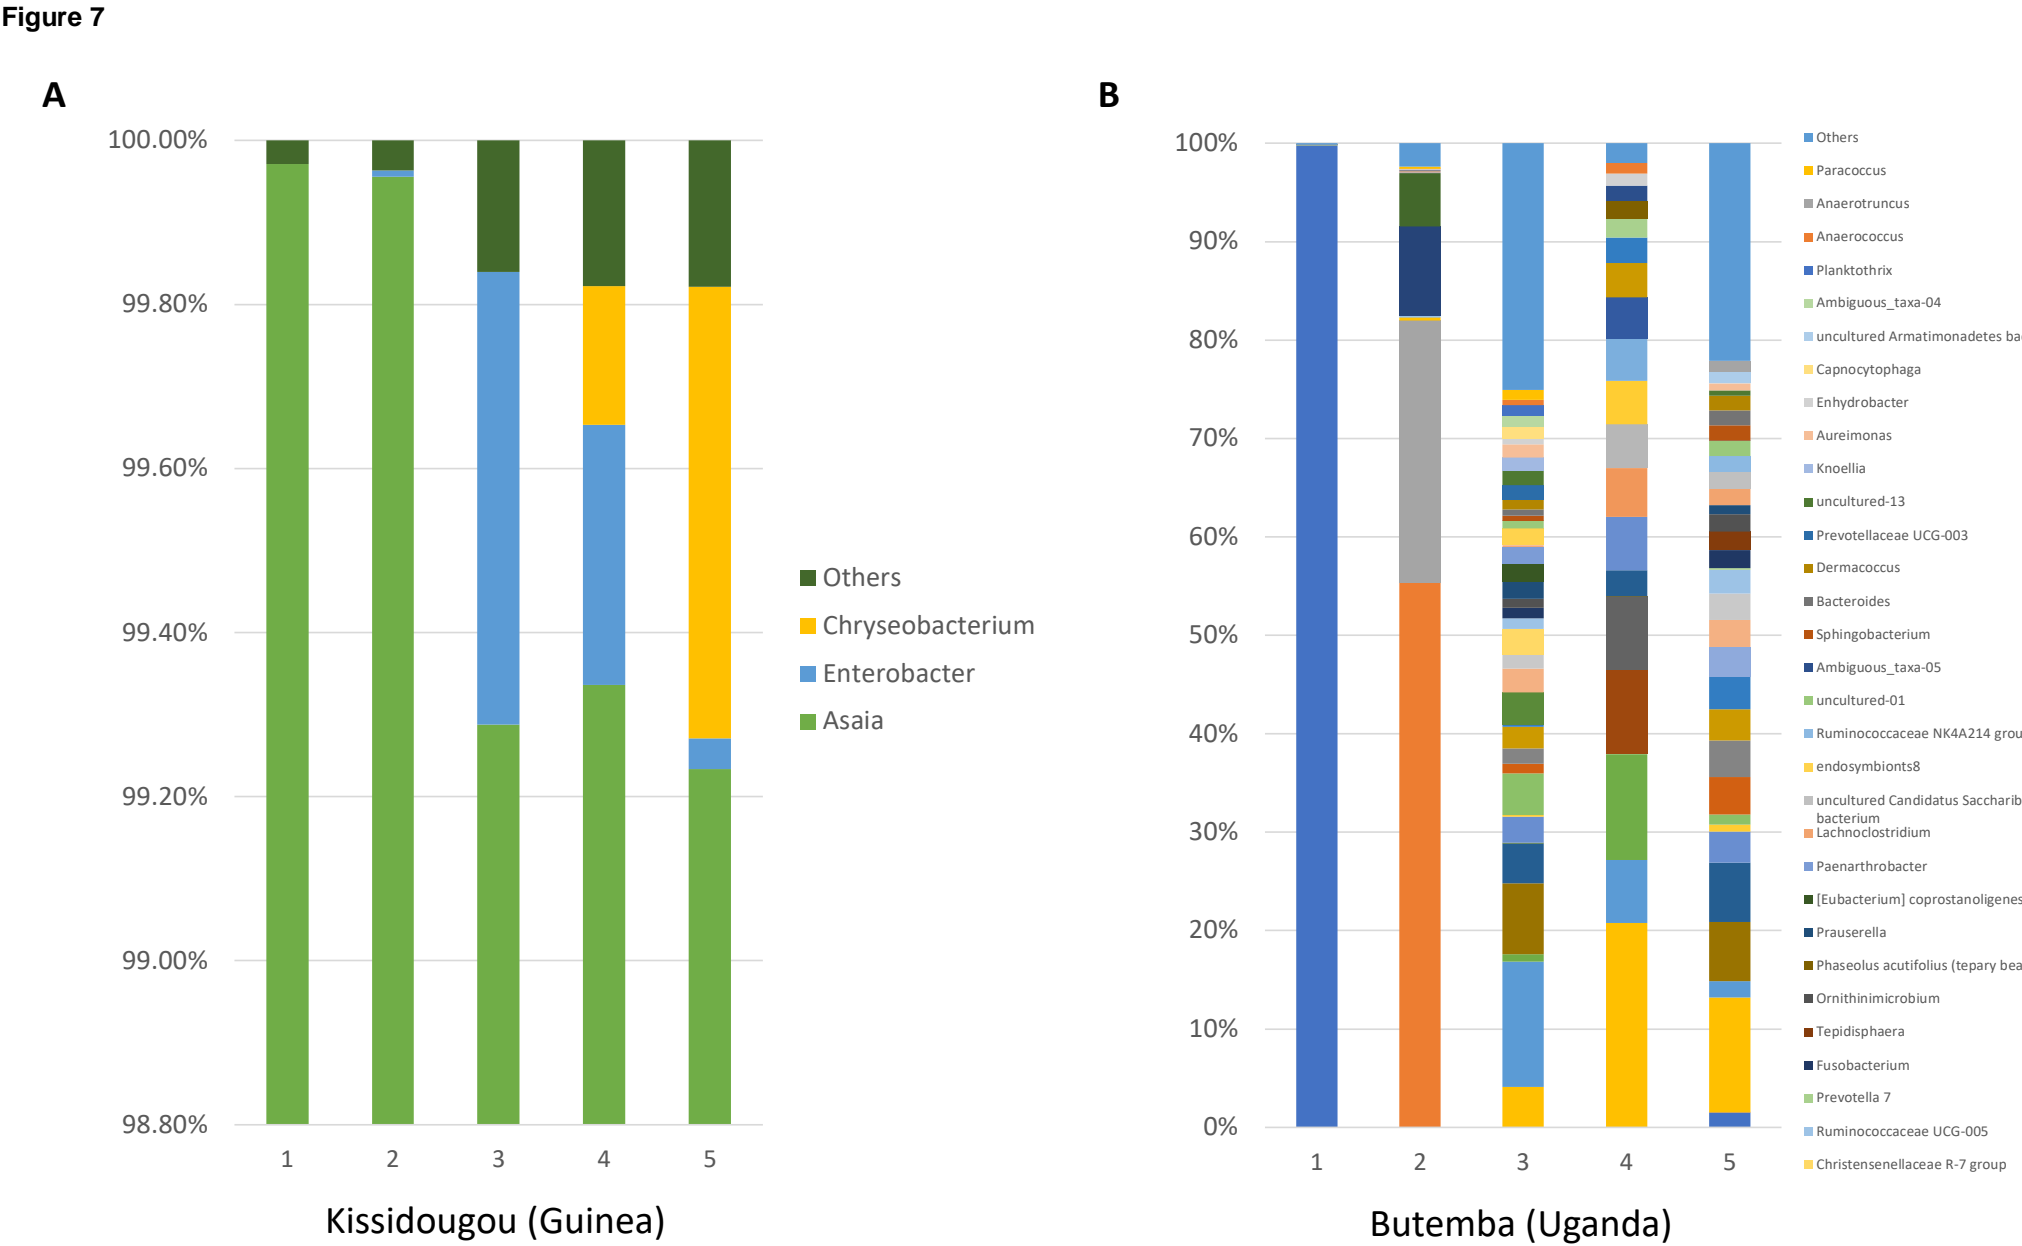

Supplementary Figure 1

A

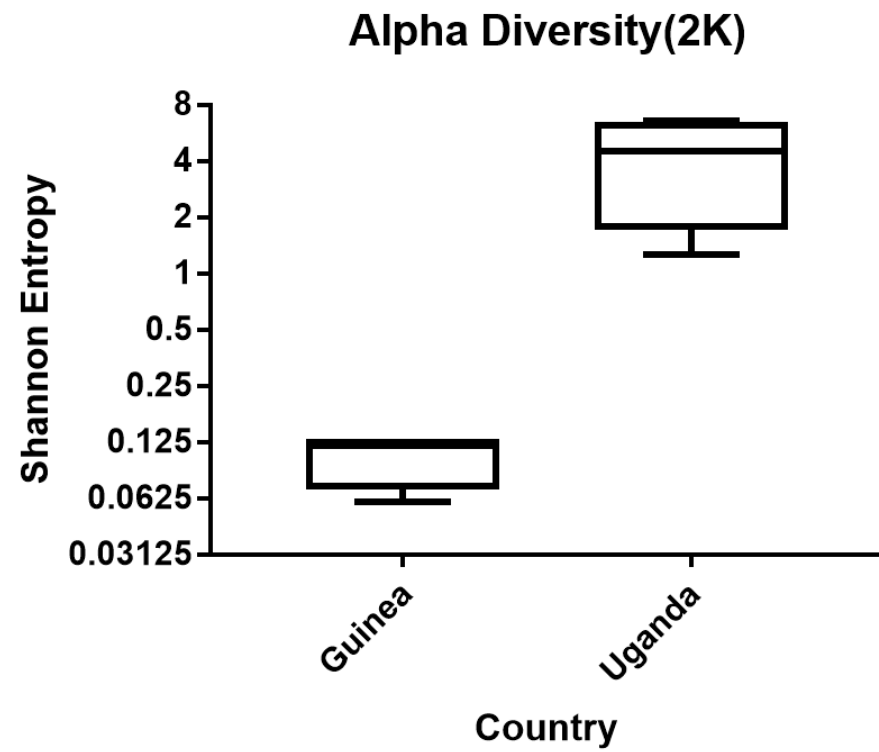

B

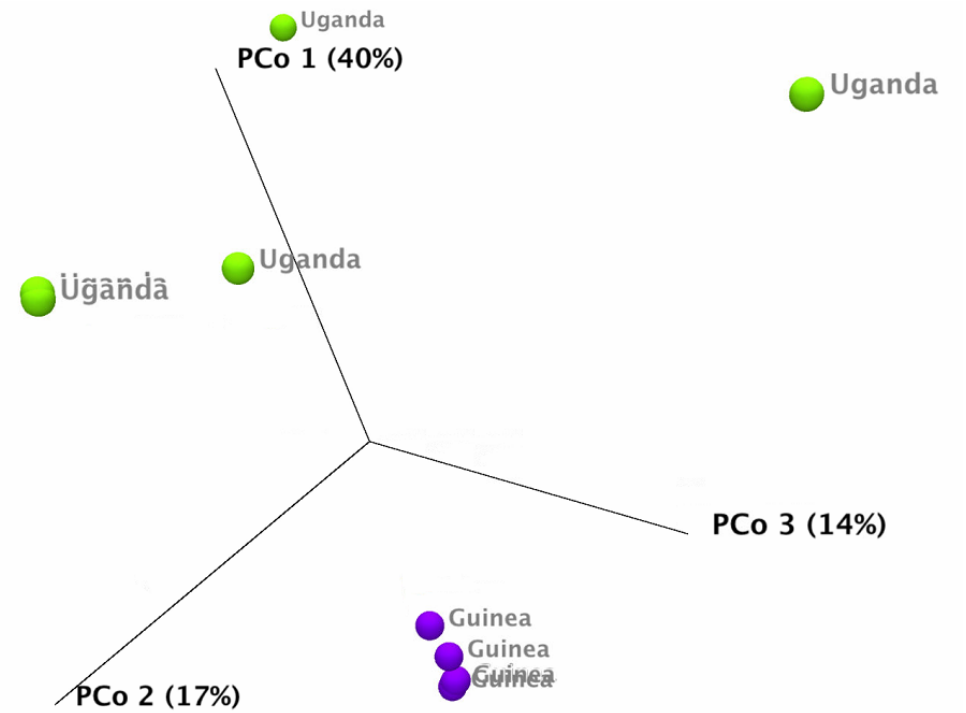



Supplementary Figure 2

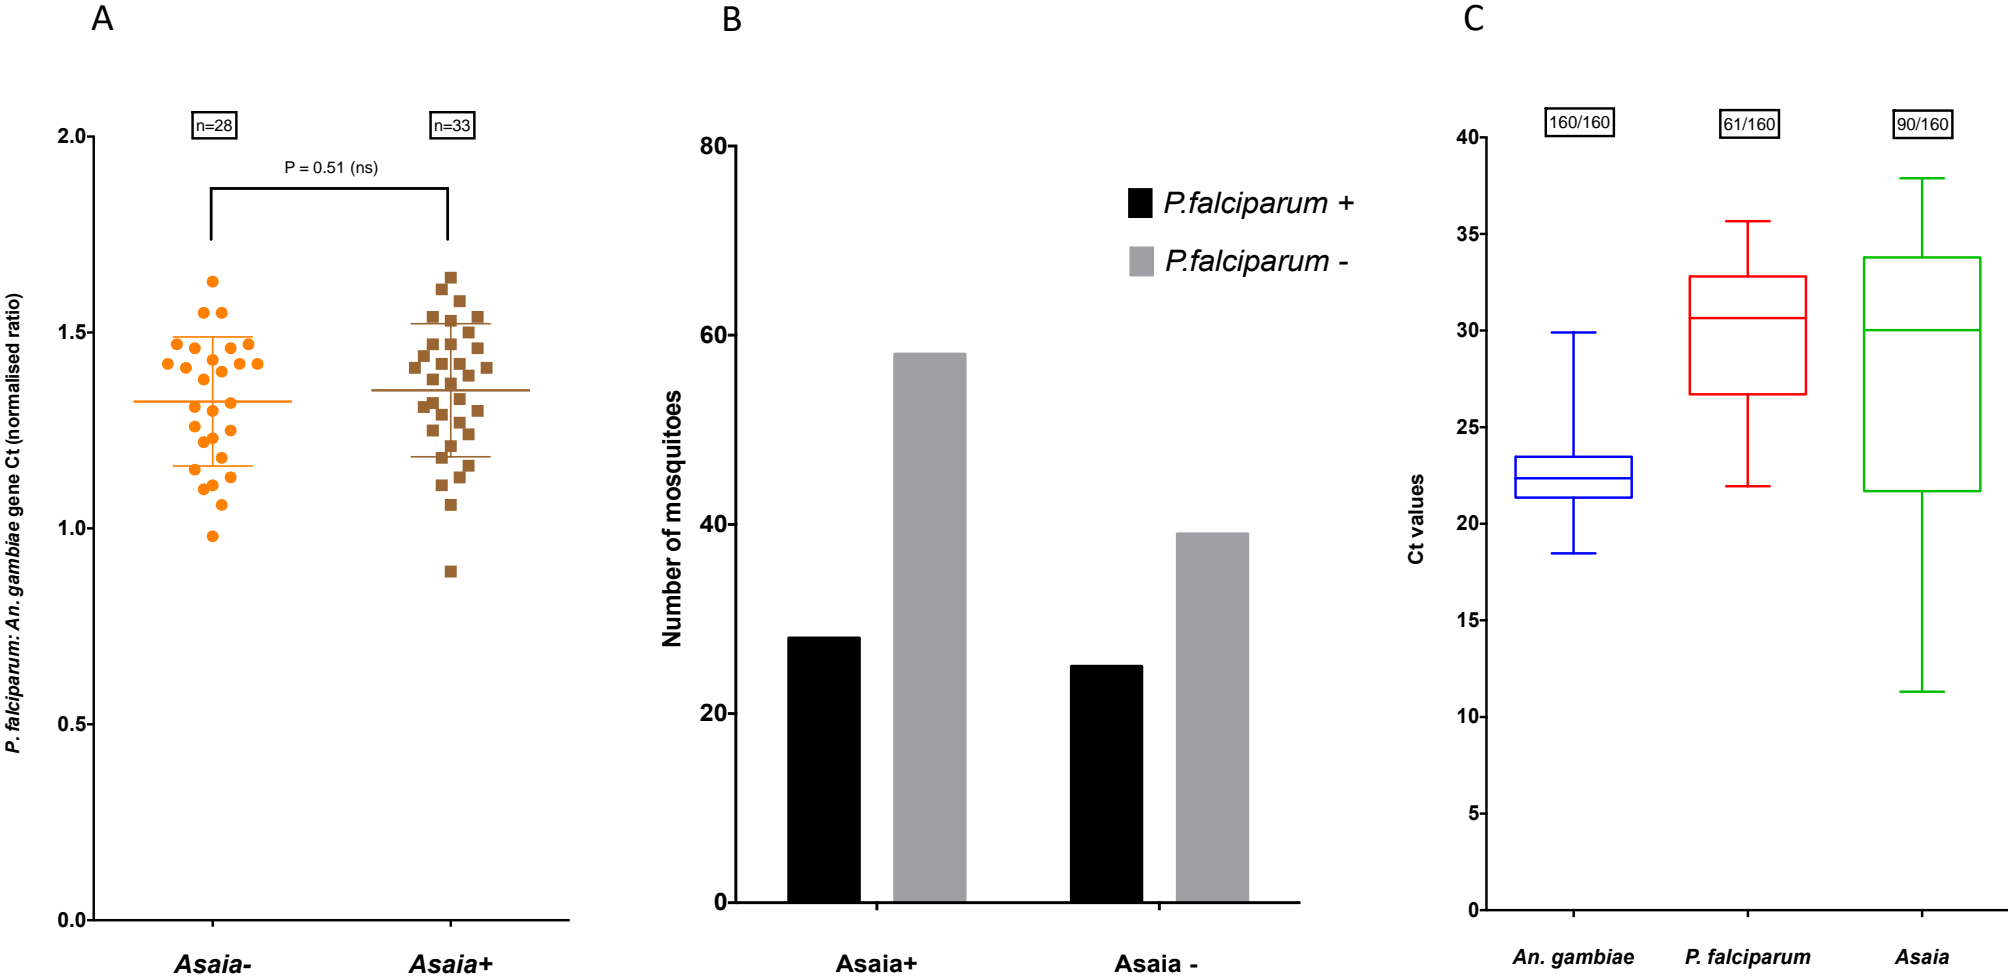

Source: https://www.biorxiv.org/content/10.1101/338434v1.full.pdf
